# Supplementary material for: The remarkable performance of a single iridium atom supported on hematite for methane activation: a density functional theory study
Source: Royal Society of Chemistry journal article supplement (doi:10.1039/d2ra03585e), 2022-01-01
Supplement: d2ra03585e1.pdf [file d2ra03585e1.pdf]

## Supporting Information

### **The Remarkable Performance of a Single Iridium Atom Supported on Hematite for Methane Activation: A Density Functional Theory Study**

Kefale Wagaw Yizengaw <sup>a, b</sup>, Tigist Ayalew Abay <sup>a</sup>, Delele Worku Ayele <sup>c</sup>, Jyh-Chiang Jiang <sup>a, \*</sup>

<sup>a</sup> Department of Chemical Engineering, National Taiwan University of Science and Technology,  
Taipei city 106, Taiwan

<sup>b</sup> Faculty of Chemical and Food Engineering, Bahir Dar Institute of Technology, Bahir Dar  
University, Bahir Dar, Ethiopia

<sup>c</sup> Department of Chemistry, College of Science, Bahir Dar University, Bahir Dar, Ethiopia

\*Corresponding author. E-mail: [jcjiang@mail.ntust.edu.tw](mailto:jcjiang@mail.ntust.edu.tw) (J.-C. Jiang)

**Table 1S.** Surface energy of the three dominant surface planes of hematite

| Surface | Top layer atom type | Surface Energy (eV /Å <sup>2</sup> ) |
|---------|---------------------|--------------------------------------|
| 110     | Fe                  | 0.140                                |
|         | O                   | 0.108                                |
|         | O                   | 0.149                                |
|         | O                   | 0.262                                |
|         | O                   | 0.232                                |
| 104     | O                   | 0.126                                |
|         | O                   | 0.129                                |
|         | Fe                  | 0.259                                |
|         | Fe                  | 0.143                                |
|         | O                   | 0.275                                |
| 012     | O                   | 0.112                                |
|         | O                   | 0.245                                |
|         | Fe                  | 0.258                                |
|         | O                   | 0.180                                |
|         | Fe                  | 0.167                                |

**Table 2S.** The dopants calculated and experimental lattice parameters, and chemical potential of the

considered dopants in this study.

| Substance | Calculated Lattice<br>a=b=c [Å] | Experimental lattice<br>a=b=c [Å] | Chemical potential |
|-----------|---------------------------------|-----------------------------------|--------------------|
| Bulk Fe   | 2.953                           | 2.853 <sup>1</sup>                | -2.879             |
| Bulk Ir   | 4.003                           | 3.381 <sup>1</sup>                | -6.575             |
| Bulk Cu   | 3.689                           | 3.632 <sup>1</sup>                | -0.862             |
| Bulk Co   | 4.194                           | 4.350 <sup>2</sup>                | -2.003             |
| Bulk Ag   | 4.076                           | 4.062 <sup>1</sup>                | -1.809             |

**Table 3S.** Adsorption energies of methane for different catalyst surface with and without Van der Waals force consideration.

| Surfaces                                                                    | Eads (eV) |            |
|-----------------------------------------------------------------------------|-----------|------------|
|                                                                             | PBE       | optB88-vdW |
| $\alpha$ -Fe <sub>2</sub> O <sub>3</sub> (110)                              | -0.041    | -0.211     |
| Ir/ $\alpha$ -Fe <sub>2</sub> O <sub>3</sub> (110)                          | -0.175    | -0.395     |
| Ir/ $\alpha$ -Fe <sub>2</sub> O <sub>3</sub> (110) <sub>O<sub>v</sub></sub> | -0.328    | -0.590     |

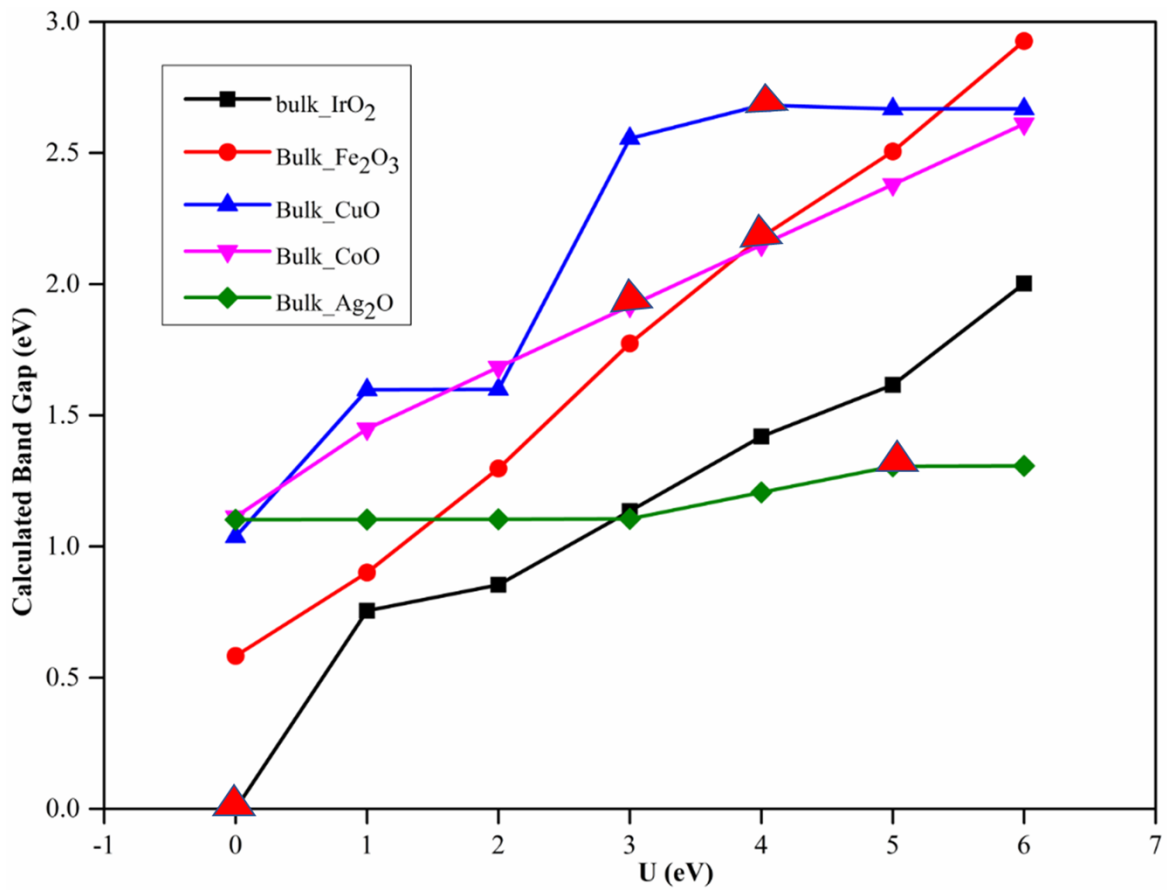

**Fig 1S.** The calculated DFT +U band gap for the oxides surface as a function of U values. The experimental data are indicated by red color filled triangle.

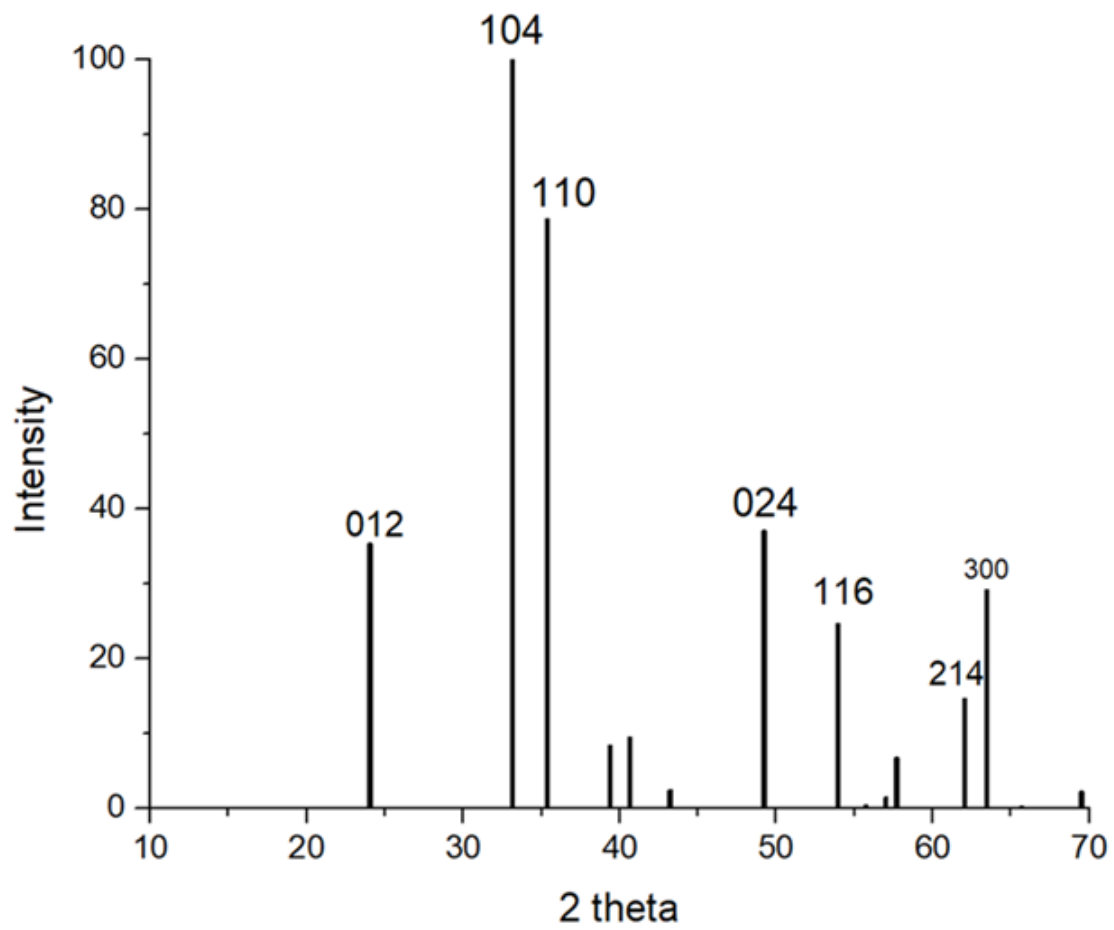

**Fig 2S.** The calculated x-ray diffraction pattern of hematite ( $\alpha\text{-Fe}_2\text{O}_3$ )

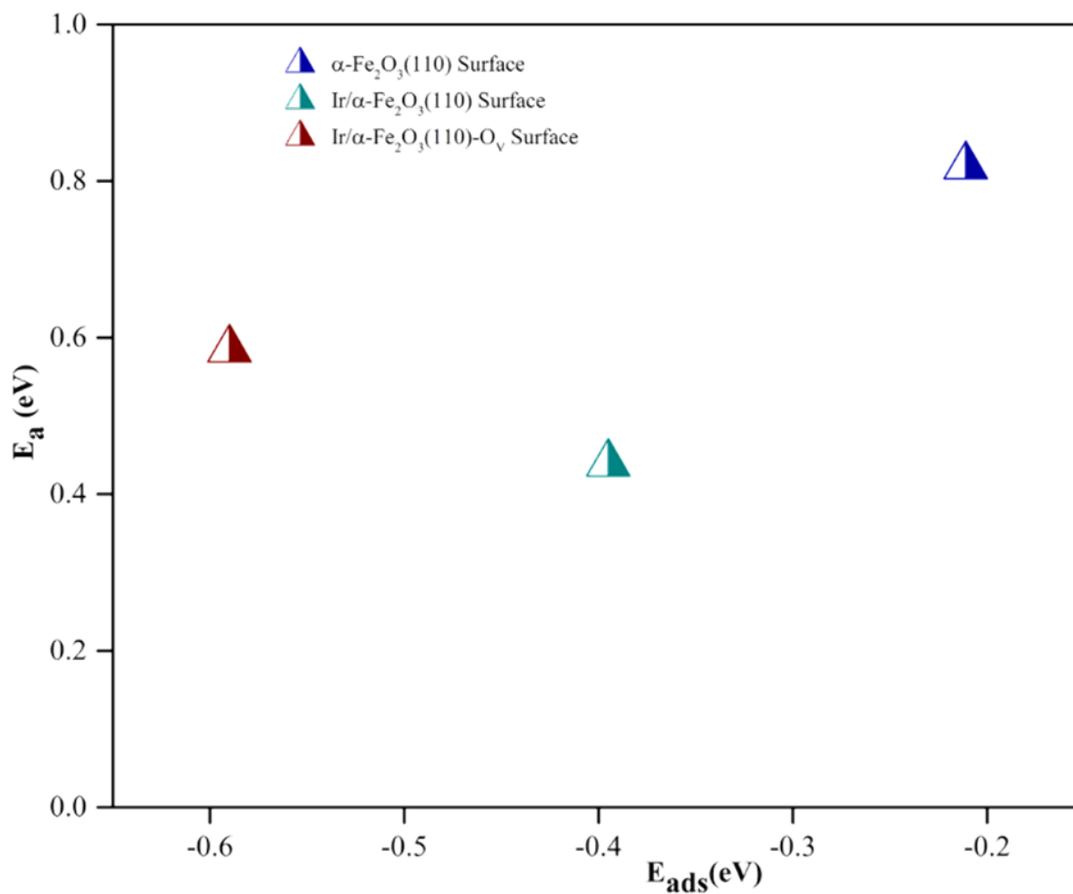

**Fig. 3S** The plot of the reaction barriers ( $E_a$ ) against their corresponding adsorption energies ( $E_{\text{ads}}$ ) over  $\alpha\text{-Fe}_2\text{O}_3(110)$ ,  $\text{Ir}/\alpha\text{-Fe}_2\text{O}_3(110)$ , and  $\text{Ir}/\alpha\text{-Fe}_2\text{O}_3(110)\text{-O}_v$  surfaces

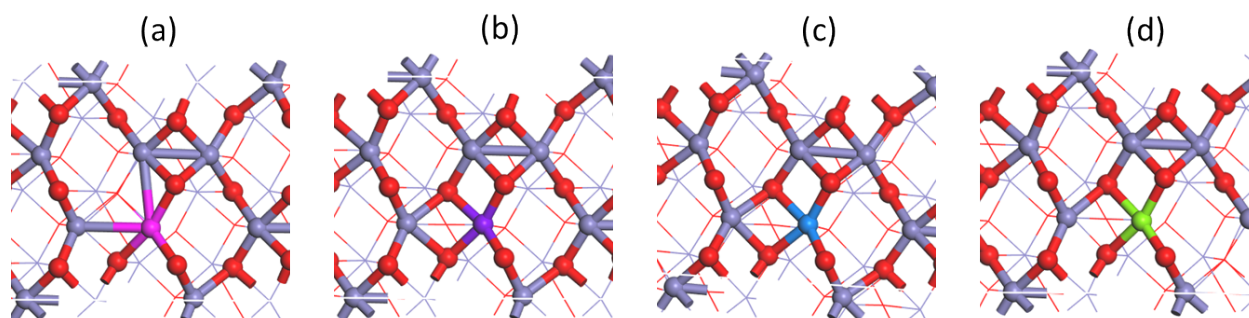

**Fig 4S.** Single atom dopant on the pristine  $\alpha\text{-Fe}_2\text{O}_3(110)$  surface: (a)  $\text{Ag}/\alpha\text{-Fe}_2\text{O}_3(110)$  surface (b)  $\text{Co}/\alpha\text{-Fe}_2\text{O}_3(110)$  surface (c)  $\text{Cu}/\alpha\text{-Fe}_2\text{O}_3(110)$  surface and (d)  $\text{Ir}/\alpha\text{-Fe}_2\text{O}_3(110)$  surface.

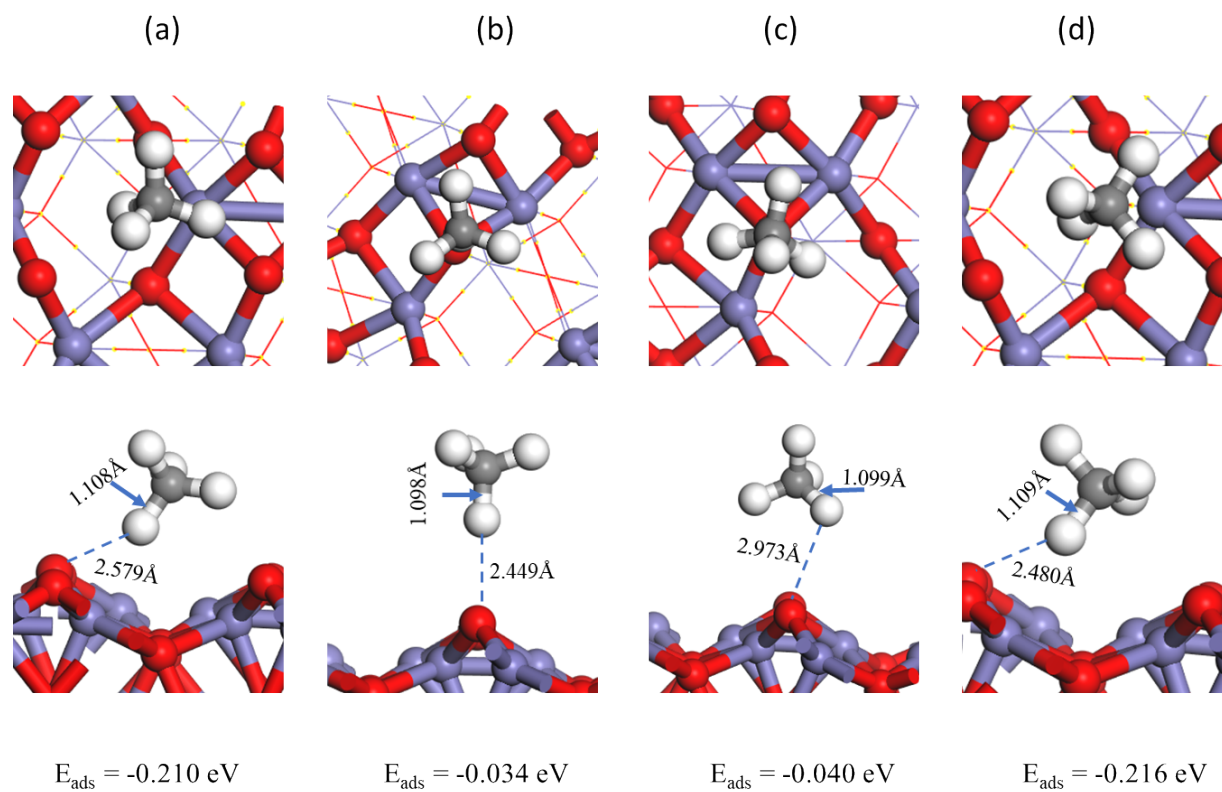

**Fig 5S.** Optimized geometries for CH<sub>4</sub> adsorption on pristine  $\alpha\text{-Fe}_2\text{O}_3(110)$  surface

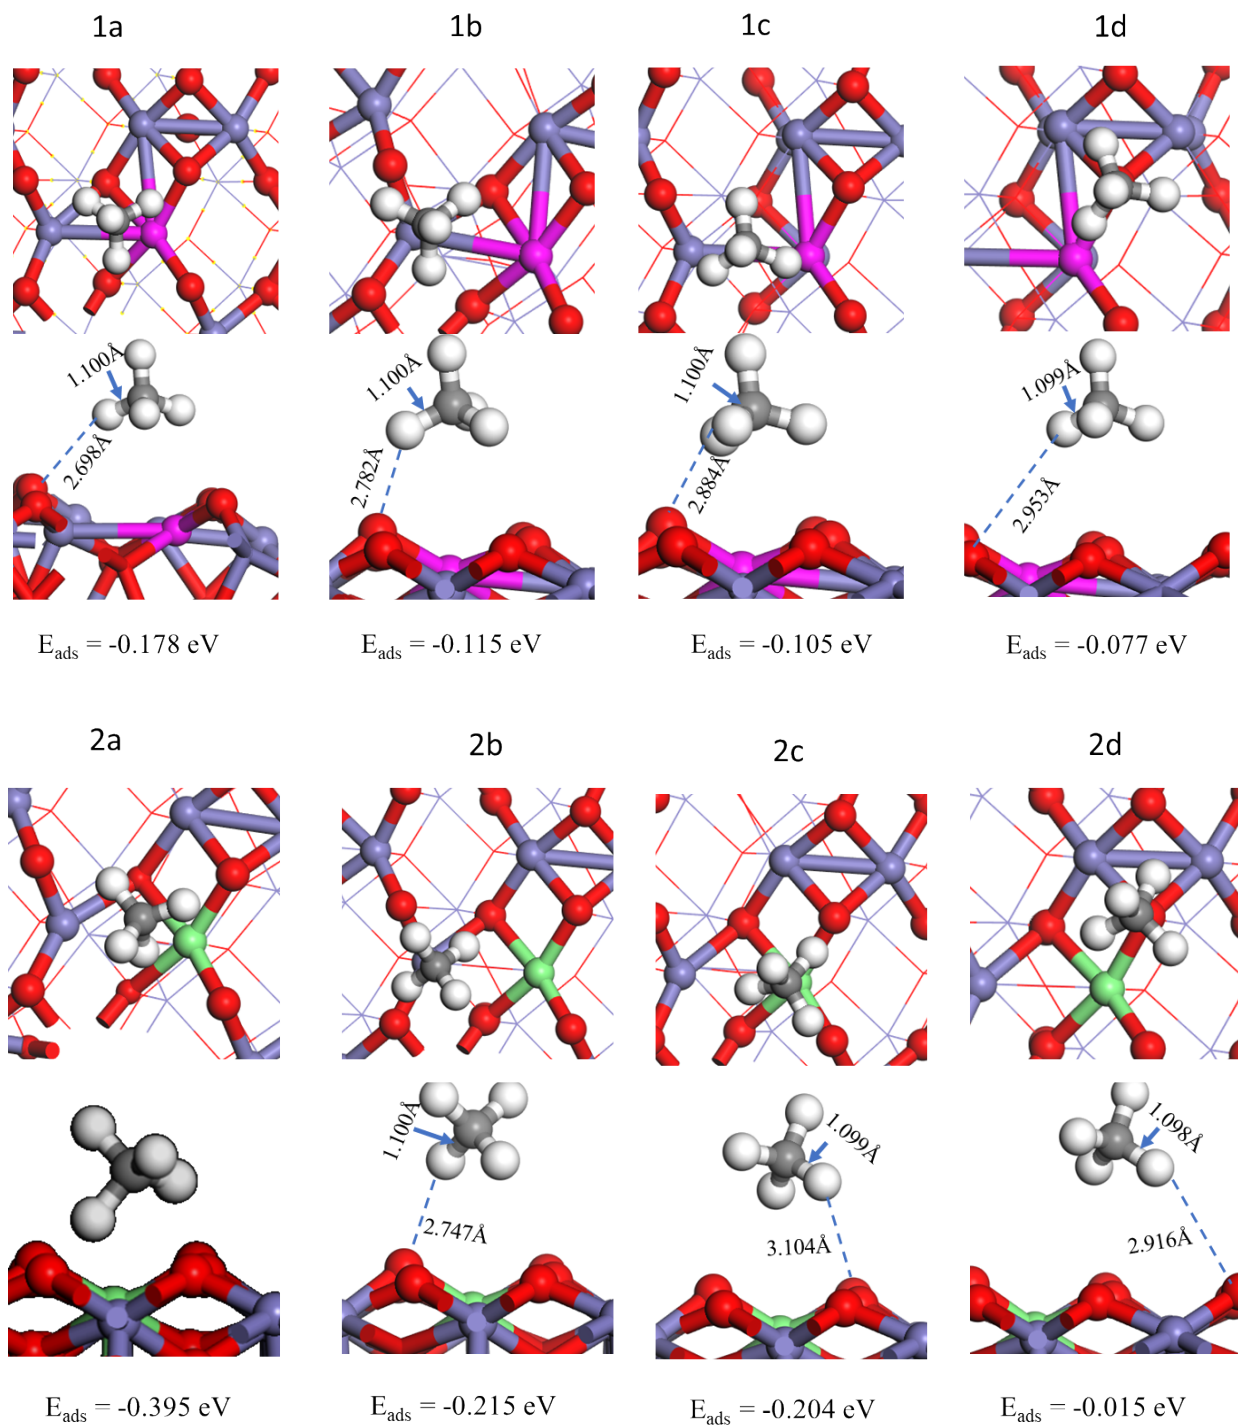

**Fig 6S.** Optimized geometries for CH<sub>4</sub> adsorption on M/ $\alpha$ -Fe<sub>2</sub>O<sub>3</sub>(110) surfaces



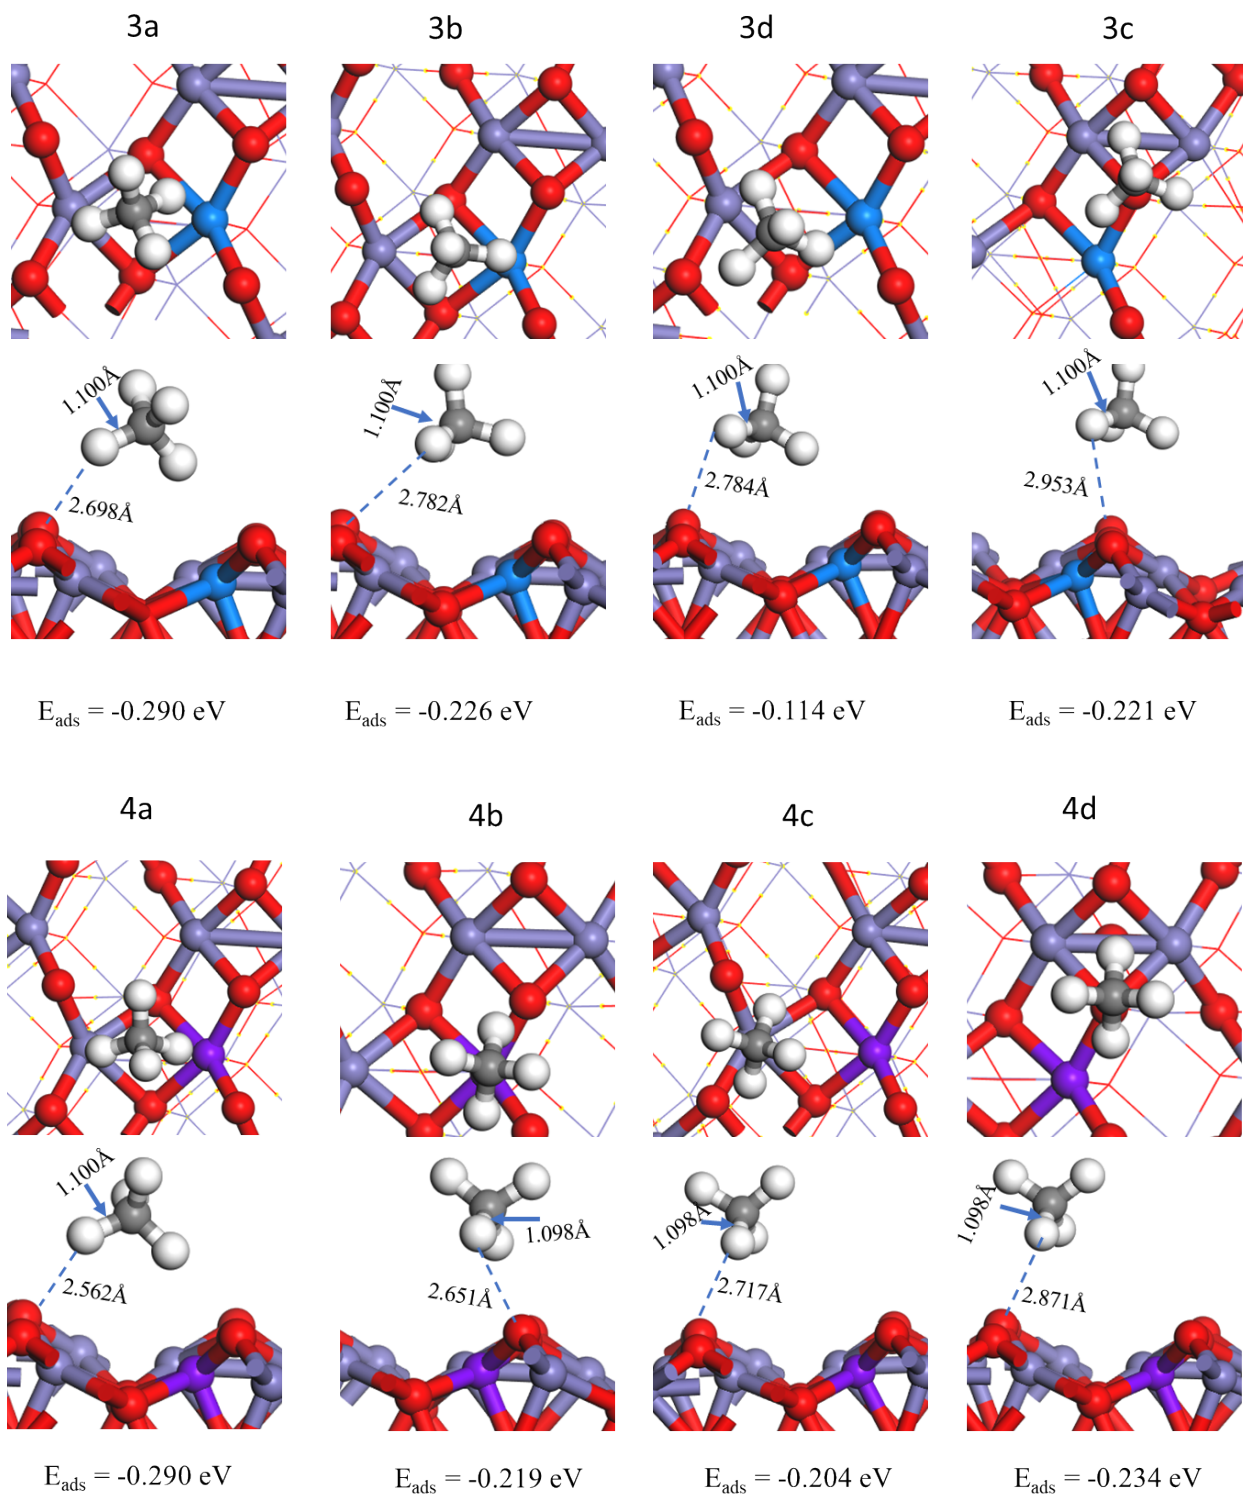

**Fig 7S.** Optimized geometries for CH<sub>4</sub> adsorption on M/ $\alpha$ -Fe<sub>2</sub>O<sub>3</sub> (110) surfaces

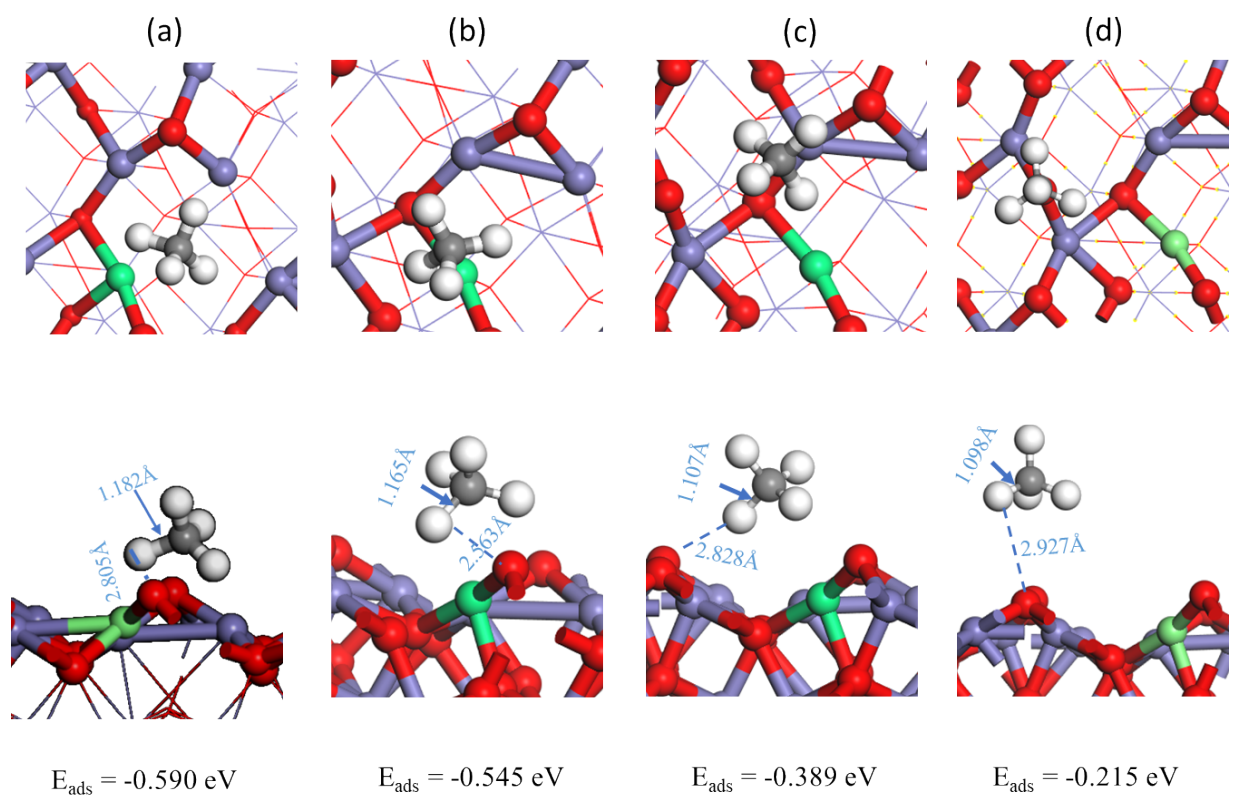

**Fig 8S.** Optimized geometries for  $\text{CH}_4$  adsorption on  $\text{Ir}/\alpha\text{-Fe}_2\text{O}_3(110)\text{-O}_V$  surfaces

**POSCAR coordinates for the structures of the catalyst, reactant, intermediate, product, and transition state were given as follows:**

**1. Initial structure of methane adsorption on  $\alpha$ -Fe<sub>2</sub>O<sub>3</sub>(110) surface:**

$$a = 13.66150 \text{ \AA} \quad \alpha = 90.0000^\circ$$

$$b = 8.56060 \text{ \AA} \quad \beta = 90.0000^\circ$$

$$c = 19.23870 \text{ \AA} \quad \gamma = 90.2605^\circ$$

**C Fe H O**

1 36 4 54

|                    |                    |                    |
|--------------------|--------------------|--------------------|
| 0.4226525265063452 | 0.6856781031428607 | 0.4530193309706322 |
| 0.9791200160000031 | 0.6666700239999983 | 0.0444899980000031 |
| 0.9802725395123421 | 0.1644339017724123 | 0.1725265396070433 |
| 0.9682568990803648 | 0.6718249922835375 | 0.3087907113928723 |
| 0.6875500080000023 | 0.6666700239999983 | 0.0444899980000031 |
| 0.6895271704881951 | 0.1652340342592861 | 0.1802459529561662 |
| 0.6788605012663804 | 0.6643559367663181 | 0.3042678719712347 |
| 0.6457899810000001 | 0.0000000000000000 | 0.0444899980000031 |
| 0.6466724578314687 | 0.4978303025515333 | 0.1726480425668969 |
| 0.6357777342137781 | 0.0055516404149212 | 0.3088564214430112 |
| 0.3542099889999974 | 0.0000000000000000 | 0.0444899980000031 |
| 0.3569927486214171 | 0.4984321437964557 | 0.1810119911212532 |
| 0.3451534172874615 | 0.9971240301605186 | 0.3050522651490231 |
| 0.3124499919999977 | 0.3333300050000005 | 0.0444899980000031 |
| 0.3136444228262403 | 0.8308260022689685 | 0.1725999517335662 |
| 0.3017062359322350 | 0.3378876067902655 | 0.3090677196582986 |
| 0.0208800010000019 | 0.3333300050000005 | 0.0444899980000031 |
| 0.0228496947295307 | 0.8318104908089222 | 0.1801714979017197 |

|                    |                    |                    |
|--------------------|--------------------|--------------------|
| 0.0117507163867171 | 0.3311097007697226 | 0.3049840515381980 |
| 0.8542100189999999 | 0.0000000000000000 | 0.0444899980000031 |
| 0.8529734873062851 | 0.5025544660637542 | 0.1726096427941194 |
| 0.8644845184240868 | 0.9960624122524288 | 0.3087527623070032 |
| 0.8124499919999977 | 0.3333300050000005 | 0.0444899980000031 |
| 0.8104281934538534 | 0.8352445163366242 | 0.1800825369458906 |
| 0.8215121204551292 | 0.3364460427602012 | 0.3051808292044799 |
| 0.5208799839999969 | 0.3333300050000005 | 0.0444899980000031 |
| 0.5198596845224446 | 0.8345585571735384 | 0.1733292193652265 |
| 0.5310908096404987 | 0.3292720518734002 | 0.3086703797890480 |
| 0.4791199860000006 | 0.6666700239999983 | 0.0444899980000031 |
| 0.4769470538499754 | 0.1678229801657908 | 0.1802832346492560 |
| 0.4876324736061203 | 0.6700570728688626 | 0.3087229479990202 |
| 0.1875499929999975 | 0.6666700239999983 | 0.0444899980000031 |
| 0.1866018692755663 | 0.1690402634253819 | 0.1726447618387354 |
| 0.1962711898078710 | 0.6625162826144413 | 0.3083036691700212 |
| 0.1457899959999978 | 0.0000000000000000 | 0.0444899980000031 |
| 0.1439443970446767 | 0.5015030613791536 | 0.1799555406272006 |
| 0.1547244195536739 | 0.0030477268218745 | 0.3053068097027326 |
| 0.4990130070304439 | 0.6478425096793191 | 0.4483165381839172 |
| 0.3858194204669505 | 0.6163446750599484 | 0.4934615316302962 |
| 0.4201513240510470 | 0.8103775683929163 | 0.4661566488794557 |
| 0.3792618420431749 | 0.6649563372614917 | 0.4051691845621705 |
| 0.9166700239999983 | 0.1804399939999968 | 0.0795100030000029 |
| 0.9160376661235174 | 0.6806757766870201 | 0.2144713711435159 |

|                    |                    |                    |
|--------------------|--------------------|--------------------|
| 0.9170558532985419 | 0.1853442661344611 | 0.3450764310990363 |
| 0.9167399999999972 | 0.8334100249999992 | 0.0934000020000028 |
| 0.9165121566179860 | 0.3332210936763100 | 0.2222659599244171 |
| 0.9163837075847100 | 0.8338852691216269 | 0.3563878595234543 |
| 0.9166700239999983 | 0.4862299859999979 | 0.0795100030000029 |
| 0.9173058760732131 | 0.9868178198230090 | 0.2145837236254867 |
| 0.9161649945911977 | 0.4825109840920725 | 0.3451081741257201 |
| 0.7500000000000000 | 0.1528899970000026 | 0.0094599999999971 |
| 0.7484615407775582 | 0.6547396362973763 | 0.1376046885811862 |
| 0.7493119269225261 | 0.1517493204673161 | 0.2746617462362265 |
| 0.7500000000000000 | 0.8471099730000020 | 0.0094599999999971 |
| 0.7513662563060315 | 0.3455833087338697 | 0.1376134323325100 |
| 0.7508574719454585 | 0.8494298870635079 | 0.2738594297955015 |
| 0.7500000000000000 | 0.5000000000000000 | 0.0000000000000000 |
| 0.7500871581679298 | 0.0004654901895262 | 0.1284259251890577 |
| 0.7505993225493874 | 0.5001361742974235 | 0.2580557643273441 |
| 0.5833299760000017 | 0.5137699839999996 | 0.0795100030000029 |
| 0.5828356560845108 | 0.0134961165016727 | 0.2146578220488072 |
| 0.5859560388719345 | 0.5168416710122353 | 0.3448413735593047 |
| 0.5832600000000028 | 0.1665900050000033 | 0.0934000020000028 |
| 0.5829298065619579 | 0.6660551789756396 | 0.2228231172412716 |
| 0.5820984250115576 | 0.1663240683153851 | 0.3564103773692484 |
| 0.5833299760000017 | 0.8195599909999984 | 0.0795100030000029 |
| 0.5838246959071323 | 0.3194408289279170 | 0.2145190600372087 |
| 0.5850567138179691 | 0.8156007930069702 | 0.3452591914205537 |

|                     |                    |                    |
|---------------------|--------------------|--------------------|
| 0.4166699949999995  | 0.1804399939999968 | 0.0094599999999971 |
| 0.4181650075525037  | 0.6786224928693725 | 0.1378830756774901 |
| 0.41671497844446589 | 0.1819155216227530 | 0.2740152687551295 |
| 0.4166699949999995  | 0.4862299859999979 | 0.0094599999999971 |
| 0.4151357454481229  | 0.9873057475856336 | 0.1378402303814280 |
| 0.4163257984724554  | 0.4846286422798701 | 0.2757045420074780 |
| 0.4166699949999995  | 0.8333299760000017 | 0.0000000000000000 |
| 0.4165967366473570  | 0.3334665906206493 | 0.1287272092660738 |
| 0.4171927671544993  | 0.8327622018186270 | 0.2595192217556178 |
| 0.2500000000000000  | 0.1528899970000026 | 0.0795100030000029 |
| 0.2508545692184660  | 0.6529086865877732 | 0.2147158098221503 |
| 0.2499794211276132  | 0.1481854538180860 | 0.3455816561576003 |
| 0.2500000000000000  | 0.5000000000000000 | 0.0934400040000014 |
| 0.2499932746099427  | 0.9998679573102215 | 0.2225010363335545 |
| 0.2471381041895062  | 0.4991418120333580 | 0.3558422927614558 |
| 0.2500000000000000  | 0.8471000190000026 | 0.0795100030000029 |
| 0.2495468887758855  | 0.3470336817102126 | 0.2147211753770651 |
| 0.2493793275401334  | 0.8511369708187072 | 0.3450073676183444 |
| 0.0833299980000035  | 0.5137699839999996 | 0.0094599999999971 |
| 0.0849149423908088  | 0.0122271917323242 | 0.1377207758408603 |
| 0.0829462686411777  | 0.5158249580540675 | 0.2735988291025465 |
| 0.0833299980000035  | 0.8195599909999984 | 0.0094599999999971 |
| 0.0819820460397105  | 0.3210738225200198 | 0.1376191736714047 |
| 0.0825000590150677  | 0.8182115199030954 | 0.2742973490636281 |
| 0.0833299980000035  | 0.1666699949999995 | 0.0000000000000000 |

|                    |                    |                    |
|--------------------|--------------------|--------------------|
| 0.0835503648735587 | 0.6669638521309014 | 0.1284739729563201 |
| 0.0835240323057392 | 0.1670347270021447 | 0.2587024480595990 |

**2. Transition structure of methane adsorption on  $\alpha$ -Fe<sub>2</sub>O<sub>3</sub>(110) surface:**

$$a = 13.66150 \text{ \AA} \quad \alpha = 90.0000^\circ$$

$$b = 8.56060 \text{ \AA} \quad \beta = 90.0000^\circ$$

$$c = 19.23870 \text{ \AA} \quad \gamma = 90.2605^\circ$$

**C Fe H O**

1 36 4 54

|                    |                    |                    |
|--------------------|--------------------|--------------------|
| 0.4049947406004380 | 0.6599885612677836 | 0.4262933294551784 |
| 0.9791200159999894 | 0.6666700239999983 | 0.0444899980000031 |
| 0.9796010642813791 | 0.1651001745807277 | 0.1726034293980777 |
| 0.9678965064630576 | 0.6738785140806588 | 0.3092947417458417 |
| 0.6875500079999970 | 0.6666700239999983 | 0.0444899980000031 |
| 0.6899813516953468 | 0.1648760701539999 | 0.1805206100477942 |
| 0.6729147251755360 | 0.6647219534935733 | 0.3028715122762395 |
| 0.6457899810000001 | 0.0000000000000000 | 0.0444899980000031 |
| 0.6471055091248468 | 0.4976366528343180 | 0.1724658449898732 |
| 0.6350576639838930 | 0.0048246522610434 | 0.3091874905084431 |
| 0.3542099889999973 | 0.0000000000000000 | 0.0444899980000031 |
| 0.3589956793362178 | 0.4990357661675107 | 0.1807710201107922 |
| 0.3447484744772137 | 0.9965713248946443 | 0.3043177129977915 |
| 0.3124499919999909 | 0.3333300050000005 | 0.0444899980000031 |
| 0.3144355116283769 | 0.8316775036783076 | 0.1723856478516537 |
| 0.3056757757154974 | 0.3360511194410853 | 0.3064486111597227 |

|                    |                    |                    |
|--------------------|--------------------|--------------------|
| 0.0208800010000014 | 0.3333300050000005 | 0.0444899980000031 |
| 0.0215549072164769 | 0.8323842886808307 | 0.1794327060261751 |
| 0.0108675384452361 | 0.3320476577095475 | 0.3052598194017878 |
| 0.8542100189999998 | 0.0000000000000000 | 0.0444899980000031 |
| 0.8527437575347655 | 0.5031909333071956 | 0.1726586515311688 |
| 0.8636445780165054 | 0.9974383908920984 | 0.3088988981171967 |
| 0.8124499919999977 | 0.3333300050000005 | 0.0444899980000031 |
| 0.8092213435681503 | 0.8350841570861489 | 0.1809624740540325 |
| 0.8207024499580026 | 0.3384646212146078 | 0.3053045348328876 |
| 0.5208799839999965 | 0.3333300050000005 | 0.0444899980000031 |
| 0.5201790957273711 | 0.8301896041997574 | 0.1759285969035446 |
| 0.5324202255397315 | 0.3305770386204331 | 0.3078006887252784 |
| 0.4791199860000004 | 0.6666700239999983 | 0.0444899980000031 |
| 0.4780418305350382 | 0.1661493380938747 | 0.1794776562673545 |
| 0.4763587719817582 | 0.6686764038054894 | 0.3222533622425871 |
| 0.1875499929999974 | 0.6666700239999983 | 0.0444899980000031 |
| 0.1863755076050180 | 0.1692960289785068 | 0.1721233590478291 |
| 0.1947486710495045 | 0.6685270979384883 | 0.3061859170248347 |
| 0.1457899959999978 | 0.0000000000000000 | 0.0444899980000031 |
| 0.1448344820746913 | 0.5016840026008855 | 0.1795599558391009 |
| 0.1535961077727302 | 0.0067650572249850 | 0.3047688819230666 |
| 0.4828317964912867 | 0.6918584799090972 | 0.4351488557515593 |
| 0.3919618608343221 | 0.5628395426074662 | 0.4628021019036375 |
| 0.3600537140581020 | 0.7606931589031358 | 0.4413609198998575 |
| 0.3393004370309302 | 0.5856040227899073 | 0.3804835121107604 |



|                    |                    |                    |
|--------------------|--------------------|--------------------|
| 0.9166700239999847 | 0.1804399939999968 | 0.0795100030000029 |
| 0.9163083111932100 | 0.6808292709309834 | 0.2149329021493452 |
| 0.9167959435501528 | 0.1868219433361995 | 0.3452535627575211 |
| 0.9167399999999972 | 0.8334100249999996 | 0.0934000020000028 |
| 0.9171122858071012 | 0.3349781870405902 | 0.2225745117723769 |
| 0.9177682310618948 | 0.8370728943868946 | 0.3566334538948852 |
| 0.9166700239999847 | 0.4862299859999981 | 0.0795100030000029 |
| 0.9168095569247215 | 0.9874888329346785 | 0.2147087251877548 |
| 0.9166453801316101 | 0.4840126223964709 | 0.3451977252965203 |
| 0.7500000000000000 | 0.1528899970000026 | 0.0094599999999971 |
| 0.7498359077740049 | 0.6544946604520033 | 0.1370771256433551 |
| 0.7496025394311090 | 0.1524503879506434 | 0.2748801059106698 |
| 0.7500000000000000 | 0.8471099730000023 | 0.0094599999999971 |
| 0.7521882954973144 | 0.3448345781818346 | 0.1378012481758867 |
| 0.7501518745942690 | 0.8496423302644992 | 0.2745656248650084 |
| 0.7500000000000000 | 0.5000000000000000 | 0.0000000000000000 |
| 0.7502111014630067 | 0.0001604249485714 | 0.1285286825841921 |
| 0.7499392150574176 | 0.5008073322105919 | 0.2582616699800703 |
| 0.5833299759999968 | 0.5137699839999996 | 0.0795100030000029 |
| 0.5826719853682375 | 0.0127891035933055 | 0.2148630328755249 |
| 0.5845959993963427 | 0.5168722270408623 | 0.3459457981065690 |
| 0.5832600000000028 | 0.1665900050000034 | 0.0934000020000028 |
| 0.5852011901159728 | 0.6656915054799478 | 0.2210362553331420 |
| 0.5817757666559590 | 0.1670269090520660 | 0.3560342117320795 |
| 0.5833299760000014 | 0.8195599909999985 | 0.0795100030000029 |

|                    |                    |                    |
|--------------------|--------------------|--------------------|
| 0.5846477396664467 | 0.3182386901404490 | 0.2139779269125577 |
| 0.5830204725534938 | 0.8165352968192180 | 0.3457100494521577 |
| 0.4166699949999993 | 0.1804399939999968 | 0.0094599999999971 |
| 0.4179804503390878 | 0.6791055904588402 | 0.1377454346517065 |
| 0.4162701460751248 | 0.1812631650257855 | 0.2734669164440727 |
| 0.4166699949999993 | 0.4862299859999981 | 0.0094599999999971 |
| 0.4150085791860706 | 0.9864712366877969 | 0.1382276355307499 |
| 0.4192804420325130 | 0.4815445376951350 | 0.2735882519716616 |
| 0.4166699949999995 | 0.8333299760000022 | 0.0000000000000000 |
| 0.4165978318845613 | 0.3325831017038208 | 0.1285288057611065 |
| 0.4159597226087709 | 0.8301298616433237 | 0.2611720848351238 |
| 0.2500000000000000 | 0.1528899970000026 | 0.0795100030000029 |
| 0.2510503742790768 | 0.6537154385357887 | 0.2143698425225027 |
| 0.2495798707723784 | 0.1534525266681077 | 0.3447299923361775 |
| 0.2500000000000000 | 0.5000000000000000 | 0.0934400040000014 |
| 0.2495582244301457 | 1.0004846229638626 | 0.2224388979469575 |
| 0.2652646856390743 | 0.5159538670360105 | 0.3564844337646556 |
| 0.2500000000000000 | 0.8471000190000031 | 0.0795100030000029 |
| 0.2496664304590270 | 0.3477737607307492 | 0.2147329019957808 |
| 0.2460353832890158 | 0.8551425815991250 | 0.3453291365298323 |
| 0.0833299980000035 | 0.5137699839999996 | 0.0094599999999971 |
| 0.0846317338878461 | 0.0130482553940170 | 0.1377356701367335 |
| 0.0876705511413425 | 0.5151095324101606 | 0.2768684085392940 |
| 0.0833299980000035 | 0.8195599909999985 | 0.0094599999999971 |
| 0.0820743781291239 | 0.3217997752620234 | 0.1377820649349836 |

|                    |                    |                    |
|--------------------|--------------------|--------------------|
| 0.0824346404745876 | 0.8191641012335337 | 0.2734028399865971 |
| 0.0833299980000035 | 0.1666699949999996 | 0.0000000000000000 |
| 0.0834222344422926 | 0.6666300911011848 | 0.1288329208608592 |
| 0.0827513575943403 | 0.1686512771853829 | 0.2583516374831766 |

**3. Intermediate structure of methane adsorption on  $\alpha$ -Fe<sub>2</sub>O<sub>3</sub>(110) surface:**

$$a = 13.66150 \text{ \AA} \quad \alpha = 90.0000^\circ$$

$$b = 8.56060 \text{ \AA} \quad \beta = 90.0000^\circ$$

$$c = 19.23870 \text{ \AA} \quad \gamma = 90.2605^\circ$$

**C Fe H O**

1 36 4 54

|                    |                     |                    |
|--------------------|---------------------|--------------------|
| 0.4196771615515436 | 0.6770220718581568  | 0.4286198330335378 |
| 0.9791200160000031 | 0.6666700239999983  | 0.0444899980000031 |
| 0.9794337372575003 | 0.1651391735004680  | 0.1724398848995963 |
| 0.9663473804715841 | 0.6736445754027759  | 0.3088854839358778 |
| 0.6875500080000023 | 0.6666700239999983  | 0.0444899980000031 |
| 0.6892899087846451 | 0.1651846175439266  | 0.1803256811733397 |
| 0.6727601820724309 | 0.6666013390082347  | 0.3022104956680702 |
| 0.6457899810000001 | 0.0000000000000000  | 0.0444899980000031 |
| 0.6476006340904520 | 0.4974650410824062  | 0.1723095093561546 |
| 0.6354022270891537 | 0.0085043022323789  | 0.3093498953164741 |
| 0.3542099889999974 | 0.0000000000000000  | 0.0444899980000031 |
| 0.3607550931463800 | 0.4990000688682077  | 0.1832932461211817 |
| 0.3458899742114009 | -0.0091710102908227 | 0.3047939646993206 |
| 0.3124499919999977 | 0.3333300050000005  | 0.0444899980000031 |
| 0.3152112590751248 | 0.8310335865998383  | 0.1722999933377418 |

|                    |                    |                    |
|--------------------|--------------------|--------------------|
| 0.3063610321406972 | 0.3276848581984379 | 0.3056870581610723 |
| 0.0208800010000019 | 0.3333300050000005 | 0.0444899980000031 |
| 0.0207419818873808 | 0.8321949306266305 | 0.1786926560339046 |
| 0.0106511464254855 | 0.3318319471370514 | 0.3049990722746485 |
| 0.8542100189999999 | 0.0000000000000000 | 0.0444899980000031 |
| 0.8525985045440979 | 0.5030077976665722 | 0.1726872133015503 |
| 0.8635198384884765 | 0.9975703606614651 | 0.3085288671662654 |
| 0.8124499919999977 | 0.3333300050000005 | 0.0444899980000031 |
| 0.8088468461926732 | 0.8351169554136932 | 0.1806567683597429 |
| 0.8203740953564674 | 0.3391504489472799 | 0.3052908303573661 |
| 0.5208799839999969 | 0.3333300050000005 | 0.0444899980000031 |
| 0.5205145989126755 | 0.8295352353913472 | 0.1766700431606878 |
| 0.5320191616219572 | 0.3351049661464313 | 0.3083686648383295 |
| 0.4791199860000006 | 0.6666700239999983 | 0.0444899980000031 |
| 0.4778927818802145 | 0.1657559427256368 | 0.1796439847794287 |
| 0.4774059018165948 | 0.6747870757770618 | 0.3291222348700371 |
| 0.1875499929999975 | 0.6666700239999983 | 0.0444899980000031 |
| 0.1865200008525266 | 0.1674393599336067 | 0.1721090956932413 |
| 0.1900599097738672 | 0.6697842661692507 | 0.3038786180567620 |
| 0.1457899959999978 | 0.0000000000000000 | 0.0444899980000031 |
| 0.1454476809065211 | 0.5004491905724021 | 0.1781170833551874 |
| 0.1539296760907751 | 0.0060239912955012 | 0.3049743283906465 |
| 0.4795403225210823 | 0.7300377530812051 | 0.4588567297657959 |
| 0.4101593099199695 | 0.5556101729259877 | 0.4471001862362436 |
| 0.3524547167553759 | 0.7459562484347592 | 0.4347808697776268 |

|                    |                    |                    |
|--------------------|--------------------|--------------------|
| 0.2899810900854782 | 0.5434000859943855 | 0.3948612500330298 |
| 0.9166700239999983 | 0.1804399939999968 | 0.0795100030000029 |
| 0.9161897878630770 | 0.6810609615201758 | 0.2144820148303146 |
| 0.9165576643872742 | 0.1869561687240026 | 0.3450201424196368 |
| 0.9167399999999972 | 0.8334100249999992 | 0.0934000020000028 |
| 0.9170953169646583 | 0.3344988293502995 | 0.2224870881584823 |
| 0.9182032328664462 | 0.8377718450788807 | 0.3564356369103727 |
| 0.9166700239999983 | 0.4862299859999979 | 0.0795100030000029 |
| 0.9170741957782869 | 0.9876597610848579 | 0.2144709578483869 |
| 0.9168653163255535 | 0.4838774911193867 | 0.3453913280909382 |
| 0.7500000000000000 | 0.1528899970000026 | 0.0094599999999971 |
| 0.7507021408056004 | 0.6541562337299356 | 0.1363585983918120 |
| 0.7489584194805028 | 0.1537422740851928 | 0.2749524900377092 |
| 0.7500000000000000 | 0.8471099730000020 | 0.0094599999999971 |
| 0.7521389622127068 | 0.3444190650592769 | 0.1376969082689650 |
| 0.7513696842341540 | 0.8508075682246046 | 0.2737803960523204 |
| 0.7500000000000000 | 0.5000000000000000 | 0.0000000000000000 |
| 0.7500661063114966 | 0.0006654952092949 | 0.1284130382718608 |
| 0.7509214420311650 | 0.5015745360907155 | 0.2576863579181776 |
| 0.5833299760000017 | 0.5137699839999996 | 0.0795100030000029 |
| 0.5825590432004016 | 0.0138187130627407 | 0.2149207518677737 |
| 0.5872095039261455 | 0.5183982384627510 | 0.3459809325988645 |
| 0.5832600000000028 | 0.1665900050000033 | 0.0934000020000028 |
| 0.5876481596441033 | 0.6669993099882779 | 0.2195780950129053 |
| 0.5793451061566237 | 0.1692214552255673 | 0.3559076814732839 |

|                    |                    |                    |
|--------------------|--------------------|--------------------|
| 0.5833299760000017 | 0.8195599909999984 | 0.0795100030000029 |
| 0.5834705123849085 | 0.3197732893222282 | 0.2142072816453792 |
| 0.5867522606188601 | 0.8203392841719032 | 0.3462101014305421 |
| 0.4166699949999995 | 0.1804399939999968 | 0.0094599999999971 |
| 0.4182304957479744 | 0.6777334037614399 | 0.1382529905805476 |
| 0.4148246345663698 | 0.1793220099961953 | 0.2729205724265049 |
| 0.4166699949999995 | 0.4862299859999979 | 0.0094599999999971 |
| 0.4148737179037381 | 0.9861770158104661 | 0.1382074750689787 |
| 0.4145337894865672 | 0.4817735368425136 | 0.2797741021609463 |
| 0.4166699949999995 | 0.8333299760000017 | 0.0000000000000000 |
| 0.4163123105320227 | 0.3332779740124771 | 0.1293196575764478 |
| 0.4171855663671490 | 0.8292280418802255 | 0.2609656846876945 |
| 0.2500000000000000 | 0.1528899970000026 | 0.0795100030000029 |
| 0.2515364291460249 | 0.6521540490332328 | 0.2149344346488036 |
| 0.2509174882130841 | 0.1477241727122827 | 0.3459472070426868 |
| 0.2500000000000000 | 0.5000000000000000 | 0.0934400040000014 |
| 0.2493071348481186 | 0.9984116253701517 | 0.2229166649942494 |
| 0.2442677435317006 | 0.4990981422268125 | 0.3606619591085769 |
| 0.2500000000000000 | 0.8471000190000026 | 0.0795100030000029 |
| 0.2496958214633771 | 0.3460843350757979 | 0.2152875687110510 |
| 0.2450269338235365 | 0.8489770292542971 | 0.3452984926084173 |
| 0.0833299980000035 | 0.5137699839999996 | 0.0094599999999971 |
| 0.0847196567329410 | 0.0127087739824328 | 0.1377778331047338 |
| 0.0857565316016434 | 0.5146971338946253 | 0.2742472987602439 |
| 0.0833299980000035 | 0.8195599909999984 | 0.0094599999999971 |

|                    |                    |                    |
|--------------------|--------------------|--------------------|
| 0.0823966347705759 | 0.3204782723468464 | 0.1376164459222506 |
| 0.0819468431921133 | 0.8185956110584932 | 0.2729523395392879 |
| 0.0833299980000035 | 0.1666699949999995 | 0.0000000000000000 |
| 0.0837323187592281 | 0.6667731727282354 | 0.1286553838982478 |
| 0.0833784445179094 | 0.1679201941396134 | 0.2589465031502531 |

**4. Initial structure of methane adsorption on  $\alpha$ -Ir/Fe<sub>2</sub>O<sub>3</sub>(110) surface:**

$$a = 13.66150 \text{ \AA} \quad \alpha = 90.0000^\circ$$

$$b = 8.56060 \text{ \AA} \quad \beta = 90.0000^\circ$$

$$c = 19.23870 \text{ \AA} \quad \gamma = 90.2605^\circ$$

|                    | <b>C</b>           | <b>Fe</b>          | <b>H</b> | <b>Ir</b> | <b>O</b> |
|--------------------|--------------------|--------------------|----------|-----------|----------|
|                    | 1                  | 35                 | 4        | 1         | 54       |
| 0.4432874413167721 | 0.3663297506046145 | 0.4468208963220686 |          |           |          |
| 0.9879000190000014 | 0.6708599930000005 | 0.0471200010000032 |          |           |          |
| 0.9795149250474876 | 0.1687417803521988 | 0.1753349464501166 |          |           |          |
| 0.9670413810997036 | 0.6661464456960814 | 0.3110856170490068 |          |           |          |
| 0.6955100300000012 | 0.6614500279999973 | 0.0453899990000011 |          |           |          |
| 0.6920411920289022 | 0.1649739269053778 | 0.1841374792201645 |          |           |          |
| 0.6835931813085151 | 0.6594678945897893 | 0.3052818328631142 |          |           |          |
| 0.6546700000000030 | 0.0039900000000017 | 0.0470100009999967 |          |           |          |
| 0.6448844927107914 | 0.4985039466934674 | 0.1730977550193172 |          |           |          |
| 0.6418963410690218 | 0.9972671293547218 | 0.3077041740793985 |          |           |          |
| 0.3623999949999970 | 0.9950399989999994 | 0.0452999990000009 |          |           |          |
| 0.3531514090689228 | 0.4995242274921619 | 0.1810135894264704 |          |           |          |
| 0.3416027697549770 | 0.9908877089505728 | 0.3060938240439815 |          |           |          |

|                    |                    |                    |
|--------------------|--------------------|--------------------|
| 0.3212400079999966 | 0.3376100059999985 | 0.0470600020000020 |
| 0.3104628270330459 | 0.8309154717473740 | 0.1712884504897885 |
| 0.2988749349996687 | 0.3400766303180908 | 0.3110948172912920 |
| 0.0288100000000000 | 0.3282800019999996 | 0.0453100020000008 |
| 0.0232503309163944 | 0.8346780420143485 | 0.1835986851321249 |
| 0.0200010761548843 | 0.3274982152273664 | 0.3177077111130308 |
| 0.8452699779999975 | 0.9957699779999984 | 0.0471200010000032 |
| 0.8554377939663138 | 0.4998976302458519 | 0.1722408276533378 |
| 0.8677676468881114 | 0.9952815528740488 | 0.3114155917379631 |
| 0.8043900130000026 | 0.3382999900000030 | 0.0453199999999967 |
| 0.8142100147809971 | 0.8323720474727340 | 0.1815942984635566 |
| 0.8278299195210834 | 0.3374905356220350 | 0.3058490051216041 |
| 0.5121799710000019 | 0.3290899989999971 | 0.0473399979999982 |
| 0.5224188383384393 | 0.8335298544921222 | 0.1713281126014455 |
| 0.4709595725829985 | 0.6716853913040026 | 0.0453841558730019 |
| 0.4802881940414542 | 0.1638434509625623 | 0.1797721690577396 |
| 0.4910442474552462 | 0.6772598484946141 | 0.3059904042189420 |
| 0.1777216767870016 | 0.6620344904570032 | 0.0471823193590026 |
| 0.1874988651278499 | 0.1672636041534482 | 0.1725593372573828 |
| 0.1960260141182355 | 0.6647972547510299 | 0.3107167840293900 |
| 0.1370828061009988 | 0.0052962692289995 | 0.0456013446709989 |
| 0.1415106592535239 | 0.4996205243432067 | 0.1847097061945555 |
| 0.1520419926882635 | 0.0068675426296816 | 0.3067029135720283 |
| 0.5153417150853777 | 0.4145285490572891 | 0.4591927009808452 |
| 0.4458719211780744 | 0.2820335728821249 | 0.4005777443982930 |



|                    |                    |                    |
|--------------------|--------------------|--------------------|
| 0.4183313787001206 | 0.2830729652270420 | 0.4868185000854807 |
| 0.3879370552840824 | 0.4561088316192317 | 0.4372128750947508 |
| 0.5175505509883852 | 0.3255467423503747 | 0.3170113484135825 |
| 0.9166700239999983 | 0.1804399939999968 | 0.0795100030000029 |
| 0.9166266978650036 | 0.6791960667705499 | 0.2157757631359803 |
| 0.9142679639678684 | 0.1835003996138007 | 0.3506000705921856 |
| 0.9168900250000007 | 0.8334699870000009 | 0.0939000030000017 |
| 0.9146065564342910 | 0.3319715700105239 | 0.2223694294429398 |
| 0.9214311325252458 | 0.8349268204731195 | 0.3582369575039616 |
| 0.9166700239999983 | 0.4862299859999979 | 0.0795100030000029 |
| 0.9175249332347338 | 0.9859861753210708 | 0.2162930865658493 |
| 0.9076599464402995 | 0.4911546827772749 | 0.3493013713720012 |
| 0.7500000000000000 | 0.1528899970000026 | 0.0094599999999971 |
| 0.7493732259194469 | 0.6534927265965289 | 0.1394266880512775 |
| 0.7508143452289781 | 0.1504439567516739 | 0.2753061888259365 |
| 0.7500000000000000 | 0.8471099730000020 | 0.0094599999999971 |
| 0.7464364787895515 | 0.3453228700116309 | 0.1385652582977775 |
| 0.7530434746026962 | 0.8470263270901125 | 0.2756557371920659 |
| 0.7500000000000000 | 0.5000000000000000 | 0.0000000000000000 |
| 0.7501515294324117 | 0.9990071399062540 | 0.1308519831181141 |
| 0.7481927604145724 | 0.4956691091326159 | 0.2584948855930520 |
| 0.5833299760000017 | 0.5137699839999996 | 0.0795100030000029 |
| 0.5845326048605468 | 0.0122381662398428 | 0.2159226294061138 |
| 0.5831331015416878 | 0.5176719615533620 | 0.3482723772170963 |
| 0.5831099749999993 | 0.1653999979999980 | 0.0930399969999982 |

|                    |                     |                    |
|--------------------|---------------------|--------------------|
| 0.5844369372649973 | 0.6679255201106932  | 0.2240533691920018 |
| 0.5898051466148100 | 0.1616868110747221  | 0.3589259576503889 |
| 0.5833299760000017 | 0.8195599909999984  | 0.0795100030000029 |
| 0.5774725742759180 | 0.3209820908707395  | 0.2211449086126714 |
| 0.5883577362832086 | 0.8122620348381361  | 0.3476015786738835 |
| 0.4166699949999995 | 0.1804399939999968  | 0.0094599999999971 |
| 0.4170036938392474 | 0.6791488870896261  | 0.1395459213860401 |
| 0.4186349841399728 | 0.1744422580094393  | 0.2733839087052689 |
| 0.4166699949999995 | 0.4862299859999979  | 0.0094599999999971 |
| 0.4171458549501073 | 0.9848920602478667  | 0.1389287392501639 |
| 0.4175830158429136 | 0.4875119565413810  | 0.2756050694075512 |
| 0.4166699949999995 | 0.8333299760000017  | 0.0000000000000000 |
| 0.4168408037460419 | 0.3326796507303129  | 0.1308495701893380 |
| 0.4176323970647737 | 0.8338831503471615  | 0.2611557219741767 |
| 0.2500000000000000 | 0.1528899970000026  | 0.0795100030000029 |
| 0.2507876637471111 | 0.6530530623265289  | 0.2168343940382843 |
| 0.2515197897978086 | 0.1489458472053971  | 0.3472452374279174 |
| 0.2497400049999996 | 0.4999499919999977  | 0.0940900000000013 |
| 0.2512731554377368 | -0.0005185480521038 | 0.2234734909109067 |
| 0.2490884868544311 | 0.5022969438418818  | 0.3590884199791913 |
| 0.2500000000000000 | 0.8471000190000026  | 0.0795100030000029 |
| 0.2493810077582228 | 0.3472830973011189  | 0.2165966823409682 |
| 0.2490845974361455 | 0.8514685245526917  | 0.3478805175888867 |
| 0.0833299980000035 | 0.5137699839999996  | 0.0094599999999971 |
| 0.0836318273407332 | 0.0119579671936188  | 0.1384188471466663 |

|                    |                    |                    |
|--------------------|--------------------|--------------------|
| 0.0832769335398198 | 0.5219054340356911 | 0.2778844475715895 |
| 0.0833299980000035 | 0.8195599909999984 | 0.0094599999999971 |
| 0.0836294299681566 | 0.3220884379037729 | 0.1387422887898951 |
| 0.0841509901754966 | 0.8206816193882052 | 0.2751161582945150 |
| 0.0833299980000035 | 0.1666699949999995 | 0.0000000000000000 |
| 0.0833955993406985 | 0.6665897790313898 | 0.1309790618689834 |
| 0.0849588939906480 | 0.1622892720361174 | 0.2560844635431927 |

**5. Transition structure of methane adsorption on  $\alpha$ -Ir/Fe<sub>2</sub>O<sub>3</sub>(110) surface:**

$$a = 13.66150 \text{ \AA} \quad \alpha = 90.0000^\circ$$

$$b = 8.56060 \text{ \AA} \quad \beta = 90.0000^\circ$$

$$c = 19.23870 \text{ \AA} \quad \gamma = 90.2605^\circ$$

**C Fe H Ir O**

1 35 4 1 54

|                    |                    |                    |
|--------------------|--------------------|--------------------|
| 0.4539004539786816 | 0.3187466832150913 | 0.4275734791050578 |
| 0.9879000190000012 | 0.6708599930000005 | 0.0471200010000032 |
| 0.9792232417917973 | 0.1688131185861104 | 0.1752609852791309 |
| 0.9673550475250277 | 0.6656971799429171 | 0.3110295661588516 |
| 0.6955100300000012 | 0.6614500279999974 | 0.0453899990000011 |
| 0.6908697871112689 | 0.1676581822629775 | 0.1836481057540153 |
| 0.6829954982382919 | 0.6588806205010634 | 0.3051945929026711 |
| 0.6546700000000025 | 0.0039900000000017 | 0.0470100009999967 |
| 0.6443031295796222 | 0.4982283534928921 | 0.1728126956467723 |
| 0.6430226603739686 | 0.9970904250873592 | 0.3072073206841134 |
| 0.3623999949999970 | 0.9950399989999995 | 0.0452999990000009 |
| 0.3530676872100582 | 0.4996919420825748 | 0.1810159692430273 |

|                    |                    |                    |
|--------------------|--------------------|--------------------|
| 0.3409557724069477 | 0.9912720814513345 | 0.3062376386786535 |
| 0.3212400079999767 | 0.3376100059999985 | 0.0470600020000020 |
| 0.3106146110815778 | 0.8315166879398395 | 0.1713605472208725 |
| 0.2985007606257157 | 0.3397144383765686 | 0.3116053833470539 |
| 0.0288100000000000 | 0.3282800019999999 | 0.0453100020000008 |
| 0.0230750395619995 | 0.8348014569024405 | 0.1834977930630751 |
| 0.0198736349577048 | 0.3271533265215080 | 0.3178108408211437 |
| 0.8452699779999970 | 0.9957699779999990 | 0.0471200010000032 |
| 0.8553448164687643 | 0.5003178254737259 | 0.1721568878106697 |
| 0.8679341561726124 | 0.9947375645496257 | 0.3115048361561482 |
| 0.8043900130000025 | 0.3382999900000032 | 0.0453199999999967 |
| 0.8139264340464416 | 0.8327872637258381 | 0.1814017038407498 |
| 0.8274332182911850 | 0.3373355552343764 | 0.3057703697716744 |
| 0.5121799710000019 | 0.3290899989999974 | 0.0473399979999982 |
| 0.5222498750778932 | 0.8344166092179475 | 0.1712055789755418 |
| 0.4709597585461010 | 0.6716829836133443 | 0.0453823088183256 |
| 0.4807611698362703 | 0.1662339471896889 | 0.1806234305213962 |
| 0.4910659957823867 | 0.6778168525264424 | 0.3060160538804348 |
| 0.1777209293261136 | 0.6620369369205582 | 0.0471812889772210 |
| 0.1874526677303236 | 0.1675259799967317 | 0.1725443627891112 |
| 0.1963990478138355 | 0.6649076412977719 | 0.3108996192709804 |
| 0.1370815585005615 | 0.0052979273494529 | 0.0456007474838742 |
| 0.1415918360446585 | 0.4997163993202833 | 0.1848057968429511 |
| 0.1512382478922412 | 0.0069782014112472 | 0.3066383438760352 |
| 0.5013877598730377 | 0.3572598594828380 | 0.4707826329883332 |

|                    |                    |                    |
|--------------------|--------------------|--------------------|
| 0.5227911383506380 | 0.2263682531735180 | 0.4040736807244725 |
| 0.4017991657513062 | 0.2269217264212378 | 0.4435224574705733 |
| 0.4105217385938797 | 0.4228312576623565 | 0.4142176028054596 |
| 0.5171679725864412 | 0.3270235191086687 | 0.3177940585433849 |
| 0.9166700239999584 | 0.1804399939999968 | 0.0795100030000029 |
| 0.9164226495919229 | 0.6794340512729586 | 0.2158896451782690 |
| 0.9137386517958230 | 0.1833171674876156 | 0.3505180999054207 |
| 0.9168900250000007 | 0.8334699870000009 | 0.0939000030000017 |
| 0.9141646961032681 | 0.3318270360633222 | 0.2223748212819516 |
| 0.9217786637121659 | 0.8345146626375259 | 0.3582879624247793 |
| 0.9166700239999584 | 0.4862299859999981 | 0.0795100030000029 |
| 0.9172089653163922 | 0.9860119481567027 | 0.2162818587125562 |
| 0.9081261841541706 | 0.4903974310201610 | 0.3491191628799563 |
| 0.7500000000000000 | 0.1528899970000026 | 0.0094599999999971 |
| 0.7492727224728617 | 0.6539791376967576 | 0.1394401969263733 |
| 0.7496264382814716 | 0.1504298902625888 | 0.2754856446528500 |
| 0.7500000000000000 | 0.8471099730000023 | 0.0094599999999971 |
| 0.7474800955697832 | 0.3463492773381475 | 0.1383746134340462 |
| 0.7528313363374249 | 0.8472885301235291 | 0.2759773864093878 |
| 0.7500000000000000 | 0.5000000000000000 | 0.0000000000000000 |
| 0.7496152404087043 | 0.9997148379484020 | 0.1309889544449421 |
| 0.7481767269887384 | 0.4962053287799140 | 0.2588884054158893 |
| 0.5833299759999968 | 0.5137699839999996 | 0.0795100030000029 |
| 0.5841045461971487 | 0.0123980725710404 | 0.2166184550034513 |
| 0.5825210479992912 | 0.5202136310325605 | 0.3490172195778797 |

|                    |                    |                    |
|--------------------|--------------------|--------------------|
| 0.5831099749999993 | 0.1653999979999980 | 0.0930399969999982 |
| 0.5843036236033207 | 0.6686984565767740 | 0.2241690437660389 |
| 0.5930934982954779 | 0.1631653550705306 | 0.3630916809507679 |
| 0.5833299760000014 | 0.8195599909999985 | 0.0795100030000029 |
| 0.5792862150936923 | 0.3213403205267824 | 0.2180397993364685 |
| 0.5880497174162291 | 0.8151346280500225 | 0.3472852182887106 |
| 0.4166699949999993 | 0.1804399939999968 | 0.0094599999999971 |
| 0.4171243250671116 | 0.6794108066770974 | 0.1397185711626910 |
| 0.4196885385021569 | 0.1747576304033700 | 0.2752547606264915 |
| 0.4166699949999993 | 0.4862299859999981 | 0.0094599999999971 |
| 0.4173170770224687 | 0.9860220395244623 | 0.1392377058431237 |
| 0.4178939272401520 | 0.4864872520467596 | 0.2761863920629967 |
| 0.4166699949999995 | 0.8333299760000022 | 0.0000000000000000 |
| 0.4162421463861487 | 0.3326336102600622 | 0.1308776749019013 |
| 0.4170429488709484 | 0.8338392621940788 | 0.2614501668561897 |
| 0.2500000000000000 | 0.1528899970000026 | 0.0795100030000029 |
| 0.2509673059476648 | 0.6531739672053039 | 0.2168993571284741 |
| 0.2499974727115743 | 0.1491866824055418 | 0.3471231545938770 |
| 0.2497400049999996 | 0.4999499919999977 | 0.0940900000000013 |
| 0.2512432061957643 | 0.0000131735503943 | 0.2235311619894619 |
| 0.2504496072121805 | 0.5034354976472184 | 0.3594486014937087 |
| 0.2500000000000000 | 0.8471000190000031 | 0.0795100030000029 |
| 0.2496695099308122 | 0.3472745067518801 | 0.2168457202554649 |
| 0.2486741207994577 | 0.8520655834064353 | 0.3480275395712161 |
| 0.0833299980000035 | 0.5137699839999996 | 0.0094599999999971 |

|                    |                    |                    |
|--------------------|--------------------|--------------------|
| 0.0836227298146886 | 0.0120441141500814 | 0.1384230708001033 |
| 0.0838819874539144 | 0.5215457609095384 | 0.2781718201729811 |
| 0.0833299980000035 | 0.8195599909999985 | 0.0094599999999971 |
| 0.0836394384851434 | 0.3222581158862265 | 0.1387746997674840 |
| 0.0840558586100947 | 0.8203818953615279 | 0.2749091673365304 |
| 0.0833299980000035 | 0.1666699949999996 | 0.0000000000000000 |
| 0.0833720468822668 | 0.6665818867892663 | 0.1310446210697994 |
| 0.0844391548431053 | 0.1625495700484638 | 0.2558798928713319 |

**6. Intermediate structure of methane adsorption on  $\alpha$ -Ir/Fe<sub>2</sub>O<sub>3</sub>(110) surface:**

$$a = 13.66150 \text{ \AA} \quad \alpha = 90.0000^\circ$$

$$b = 8.56060 \text{ \AA} \quad \beta = 90.0000^\circ$$

$$c = 19.23870 \text{ \AA} \quad \gamma = 90.2605^\circ$$

**C Fe H Ir O**

1 35 4 1 54

|                    |                    |                    |
|--------------------|--------------------|--------------------|
| 0.4433441242658865 | 0.3408586675258102 | 0.4180283234817023 |
| 0.9879000190000014 | 0.6708599930000005 | 0.0471200010000032 |
| 0.9790917696881959 | 0.1697449600752632 | 0.1753014348512432 |
| 0.9661003821520042 | 0.6664943797316968 | 0.3108304307118652 |
| 0.6955100300000012 | 0.6614500279999973 | 0.0453899990000011 |
| 0.6899378592801715 | 0.1704615253161215 | 0.1823929696497364 |
| 0.6811330190892130 | 0.6571249384672510 | 0.3058118203985537 |
| 0.6546700000000030 | 0.0039900000000017 | 0.0470100009999967 |
| 0.6432718068019093 | 0.4977436124682833 | 0.1730496299022507 |
| 0.6462908722809652 | 0.9941776521026799 | 0.3042889609108446 |
| 0.3623999949999970 | 0.9950399989999994 | 0.0452999990000009 |

|                    |                    |                    |
|--------------------|--------------------|--------------------|
| 0.3520496991208874 | 0.4998193442260372 | 0.1812002685027340 |
| 0.3396106247468464 | 0.9942506360817729 | 0.3065390487811711 |
| 0.3212400079999966 | 0.3376100059999985 | 0.0470600020000020 |
| 0.3105452548591560 | 0.8328848313371934 | 0.1716065670187803 |
| 0.2971408669693070 | 0.3441116720832676 | 0.3144297831216925 |
| 0.0288100000000000 | 0.3282800019999996 | 0.0453100020000008 |
| 0.0228163134533180 | 0.8356795325970146 | 0.1831845264625387 |
| 0.0196929457081115 | 0.3291654543620051 | 0.3178076394424279 |
| 0.8452699779999975 | 0.9957699779999984 | 0.0471200010000032 |
| 0.8551170095311745 | 0.5011322615388384 | 0.1718852520601988 |
| 0.8686068068083994 | 0.9958815237386929 | 0.3113435994995591 |
| 0.8043900130000026 | 0.3382999900000030 | 0.0453199999999967 |
| 0.8136903501377675 | 0.8330397348207160 | 0.1809568230488353 |
| 0.8271272887912637 | 0.3380127142052160 | 0.3056304786090417 |
| 0.5121799710000019 | 0.3290899989999971 | 0.0473399979999982 |
| 0.5215761797132842 | 0.8343821883707035 | 0.1709756060475201 |
| 0.4709599910000009 | 0.6716799739999999 | 0.0453800000000015 |
| 0.4812673163443343 | 0.1686862532893804 | 0.1821499849613316 |
| 0.4899245220921123 | 0.6817848287698087 | 0.3071281557726149 |
| 0.1777199949999968 | 0.6620399950000007 | 0.0471800010000010 |
| 0.1876397965354659 | 0.1690240137672298 | 0.1726627378786304 |
| 0.1938084542873514 | 0.6690048180466154 | 0.3102316277219200 |
| 0.1370799990000009 | 0.0052999999999983 | 0.0456000009999968 |
| 0.1412743285534383 | 0.5002941002004218 | 0.1848420046891255 |
| 0.1501679758273327 | 0.0096044216538420 | 0.3069131747224214 |



|                    |                    |                    |
|--------------------|--------------------|--------------------|
| 0.5013067297640228 | 0.3732929058087384 | 0.4552538776184463 |
| 0.5682390144826768 | 0.1390598150060085 | 0.4103856029185921 |
| 0.4108385042178391 | 0.2271888326766085 | 0.4327805426550534 |
| 0.3860585853008176 | 0.4310421722787677 | 0.4218145925272489 |
| 0.5105962044797271 | 0.3330201569822693 | 0.3217260023165369 |
| 0.9166700239999983 | 0.1804399939999968 | 0.0795100030000029 |
| 0.9158408518521256 | 0.6803050483159837 | 0.2156917560971483 |
| 0.9136620579143391 | 0.1844646268577044 | 0.3505445645284854 |
| 0.9168900250000007 | 0.8334699870000009 | 0.0939000030000017 |
| 0.9133938565183775 | 0.3323598080499423 | 0.2223677593370074 |
| 0.9211526158287386 | 0.8353330376896104 | 0.3585380501798415 |
| 0.9166700239999983 | 0.4862299859999979 | 0.0795100030000029 |
| 0.9168779396370397 | 0.9867785505950529 | 0.2161432940079427 |
| 0.9071718031337052 | 0.4913673308734170 | 0.3492820621079150 |
| 0.7500000000000000 | 0.1528899970000026 | 0.0094599999999971 |
| 0.7487283242741982 | 0.6543974081799503 | 0.1396000900326617 |
| 0.7487624139592363 | 0.1505231498369772 | 0.2758086112571818 |
| 0.7500000000000000 | 0.8471099730000020 | 0.0094599999999971 |
| 0.7483845001931456 | 0.3479194236022392 | 0.1381413505867183 |
| 0.7526599125286351 | 0.8455550330824484 | 0.2756634300809660 |
| 0.7500000000000000 | 0.5000000000000000 | 0.0000000000000000 |
| 0.7494697673597750 | 0.0003771127512075 | 0.1309656643779012 |
| 0.7470946033345048 | 0.4963964523176719 | 0.2596147104470051 |
| 0.5833299760000017 | 0.5137699839999996 | 0.0795100030000029 |
| 0.5841648565042190 | 0.0112142804160814 | 0.2162929712951046 |

|                    |                    |                    |
|--------------------|--------------------|--------------------|
| 0.5793324749567567 | 0.5245867791771158 | 0.3512766342633800 |
| 0.5831099749999993 | 0.1653999979999980 | 0.0930399969999982 |
| 0.5831395567589515 | 0.6687169982411415 | 0.2251503633428600 |
| 0.5945986908745261 | 0.1679977922496169 | 0.3648048415363360 |
| 0.5833299760000017 | 0.8195599909999984 | 0.0795100030000029 |
| 0.5817526696860756 | 0.3189322347183973 | 0.2159345237523130 |
| 0.5877174521997400 | 0.8210983564879564 | 0.3478818398495162 |
| 0.4166699949999995 | 0.1804399939999968 | 0.0094599999999971 |
| 0.4168277161728253 | 0.6795583806054193 | 0.1399904015150164 |
| 0.4204819346764146 | 0.1751112623881217 | 0.2771896111594343 |
| 0.4166699949999995 | 0.4862299859999979 | 0.0094599999999971 |
| 0.4174316173344987 | 0.9872792904497539 | 0.1396058308624390 |
| 0.4158924345358605 | 0.4891024673942870 | 0.2778093540178415 |
| 0.4166699949999995 | 0.8333299760000017 | 0.0000000000000000 |
| 0.4159793018668866 | 0.3330721333602526 | 0.1312894243486877 |
| 0.4158445493372462 | 0.8357577229420536 | 0.2620478257367571 |
| 0.2500000000000000 | 0.1528899970000026 | 0.0795100030000029 |
| 0.2504912639750611 | 0.6544481306456535 | 0.2169442157521644 |
| 0.2479133919418693 | 0.1515581368375910 | 0.3472793188305884 |
| 0.2497400049999996 | 0.4999499919999977 | 0.0940900000000013 |
| 0.2506512395878171 | 0.0014376060195805 | 0.2236652884879057 |
| 0.2423264914333685 | 0.5055295388564843 | 0.3596838220053762 |
| 0.2500000000000000 | 0.8471000190000026 | 0.0795100030000029 |
| 0.2496443391254720 | 0.3482879179010165 | 0.2179843625475987 |
| 0.2475465753575125 | 0.8544785268974403 | 0.3482683770687576 |

|                    |                    |                    |
|--------------------|--------------------|--------------------|
| 0.0833299980000035 | 0.5137699839999996 | 0.0094599999999971 |
| 0.0836371553868642 | 0.0128471355810842 | 0.1384471264562122 |
| 0.0813905119547137 | 0.5237297369420970 | 0.2767694410326285 |
| 0.0833299980000035 | 0.8195599909999984 | 0.0094599999999971 |
| 0.0836961101883508 | 0.3228568495555851 | 0.1386842344562008 |
| 0.0830530622937821 | 0.8224317218751482 | 0.2749582041803966 |
| 0.0833299980000035 | 0.1666699949999995 | 0.0000000000000000 |
| 0.0832600776035767 | 0.6671459131005431 | 0.1309637371718034 |
| 0.0834488476332483 | 0.1642953609825137 | 0.2557255171196485 |

**7. Initial structure of methane adsorption on  $\alpha$ -Ir/Fe<sub>2</sub>O<sub>3</sub>(110)-O<sub>v</sub> surface:**

$$a = 13.66150 \text{ \AA} \quad \alpha = 90.0000^\circ$$

$$b = 8.56060 \text{ \AA} \quad \beta = 90.0000^\circ$$

$$c = 19.23870 \text{ \AA} \quad \gamma = 90.2605^\circ$$

**C Fe H Ir O**

1 35 4 1 53

|                    |                    |                    |
|--------------------|--------------------|--------------------|
| 0.6150249318240115 | 0.4090565074098663 | 0.4148380167151556 |
| 0.9879386295190002 | 0.6708852831529981 | 0.0471818204550019 |
| 0.9794819037748046 | 0.1651149046320610 | 0.1726391480020888 |
| 0.9692544862792546 | 0.6716650649179725 | 0.3105504424517636 |
| 0.6955655656550022 | 0.6614624020240001 | 0.0453409369020008 |
| 0.6890558028671980 | 0.1681019330323777 | 0.1873636997420036 |
| 0.6953659144953914 | 0.6641249954494867 | 0.3052941778992493 |
| 0.6546598067689970 | 0.0039537136630017 | 0.0471157021409994 |
| 0.6436828263396904 | 0.4950887594882640 | 0.1730686368193604 |
| 0.6312393735678283 | 0.9856778215733585 | 0.3110889673306202 |

|                    |                    |                    |
|--------------------|--------------------|--------------------|
| 0.3623605094620004 | 0.9949854423459996 | 0.0453463047469995 |
| 0.3545977564958109 | 0.4975285890868630 | 0.1827098476624197 |
| 0.3443831446607434 | 0.9929270764830191 | 0.3075894816594308 |
| 0.3213507213540012 | 0.3377258383129984 | 0.0471271640720019 |
| 0.3115774223767923 | 0.8316715590535410 | 0.1715133137915415 |
| 0.3042891070243519 | 0.3393401515717769 | 0.3156578104774105 |
| 0.0286894169090033 | 0.3281823687930014 | 0.0452874214970009 |
| 0.0220499517831633 | 0.8340231164120906 | 0.1829750432551153 |
| 0.0127915279527717 | 0.3307705278458747 | 0.3079006013758941 |
| 0.8453391402499975 | 0.9959138295349987 | 0.0472253298010017 |
| 0.8543156933190194 | 0.5014888217949873 | 0.1719716829075727 |
| 0.8639979759110756 | 0.9947038095048434 | 0.3112660300259839 |
| 0.8045265554040029 | 0.3381685050470011 | 0.0452105561310034 |
| 0.8114571480371663 | 0.8354980351833777 | 0.1816808607994489 |
| 0.8230194358412982 | 0.3335357731744854 | 0.3061700809927556 |
| 0.5123228832730007 | 0.3294095921010012 | 0.0474033937359977 |
| 0.5227432216651178 | 0.8334165502610907 | 0.1705811175912148 |
| 0.4712415014099989 | 0.6715918206569995 | 0.0454063771489999 |
| 0.4827939304576302 | 0.1667749013962050 | 0.1787220412527428 |
| 0.4912332399982256 | 0.6712080046972122 | 0.2994151203277879 |
| 0.1787305590139994 | 0.6625370348399997 | 0.0471102783410018 |
| 0.1900440393500246 | 0.1694697949189139 | 0.1726081161075059 |
| 0.1982000721424968 | 0.6622694496195850 | 0.3112379850377774 |
| 0.1379506333559988 | 0.0050515697120019 | 0.0452295293950016 |
| 0.1453102102661609 | 0.4995676421259814 | 0.1830208361917487 |

|                    |                    |                    |
|--------------------|--------------------|--------------------|
| 0.1548449334725559 | 0.0043470547142826 | 0.3063848396899320 |
| 0.5343084168795861 | 0.4346811615980010 | 0.3959795669610820 |
| 0.6395379907209021 | 0.5284618573999834 | 0.4274720705222175 |
| 0.6056155281298581 | 0.3368277523058231 | 0.4614075426182835 |
| 0.6660600192815945 | 0.3516813880936700 | 0.3791453114907378 |
| 0.5022296038311981 | 0.3065322021650129 | 0.3244532895292675 |
| 0.9166700239999983 | 0.1804399939999968 | 0.0795100030000029 |
| 0.9156326853836060 | 0.6800707226316561 | 0.2163856859498373 |
| 0.9166144517328980 | 0.1845291595502848 | 0.3486218311030220 |
| 0.9168837479650023 | 0.8333063657279993 | 0.0939248907709995 |
| 0.9163771919669721 | 0.3291872762292039 | 0.2242422083773656 |
| 0.9146174573299136 | 0.8308712065502580 | 0.3585935845806001 |
| 0.9166700239999983 | 0.4862299859999979 | 0.0795100030000029 |
| 0.9169591720997108 | 0.9877558947746615 | 0.2166208686588480 |
| 0.9188063857640932 | 0.4830555163709983 | 0.3467199173482642 |
| 0.7500000000000000 | 0.1528899970000026 | 0.0094599999999971 |
| 0.7499417986793747 | 0.6531144806853634 | 0.1395550260766723 |
| 0.7400310400984841 | 0.1554022715677042 | 0.2840641048921899 |
| 0.7500000000000000 | 0.8471099730000020 | 0.0094599999999971 |
| 0.7499956977121379 | 0.3436573358149357 | 0.1396657468348600 |
| 0.7517825930573696 | 0.8635398634266181 | 0.2738224886553629 |
| 0.7500000000000000 | 0.5000000000000000 | 0.0000000000000000 |
| 0.7495313247612394 | 0.0029638257510161 | 0.1312206535133542 |
| 0.7497935330324828 | 0.4904125477844862 | 0.2596123443945703 |
| 0.5839357377439995 | 0.5144648866819992 | 0.0784007022329973 |

|                    |                    |                    |
|--------------------|--------------------|--------------------|
| 0.5834366855504139 | 0.0096907181864957 | 0.2165867475372012 |
| 0.5833969934650014 | 0.1659377339019983 | 0.0936622551799999 |
| 0.5824793444903255 | 0.6626650887568822 | 0.2219253868087470 |
| 0.5530873135610612 | 0.1173963756114116 | 0.3629894998436739 |
| 0.5833299760000017 | 0.8195599909999984 | 0.0795100030000029 |
| 0.5808865061571017 | 0.3195108871878705 | 0.2170245734022719 |
| 0.5891512476795436 | 0.7790529790991688 | 0.3506403095045809 |
| 0.4166699949999995 | 0.1804399939999968 | 0.0094599999999971 |
| 0.4158689553268634 | 0.6786596101303528 | 0.1392591110784344 |
| 0.4123074071868304 | 0.1768261600618553 | 0.2665701393186284 |
| 0.4166699949999995 | 0.4862299859999979 | 0.0094599999999971 |
| 0.4171819006839774 | 0.9851660780499834 | 0.1386469354650990 |
| 0.4203510427507645 | 0.4871038541574923 | 0.2759632377286187 |
| 0.4166699949999995 | 0.8333299760000017 | 0.0000000000000000 |
| 0.4165481845135208 | 0.3339148585974339 | 0.1299500574223570 |
| 0.4183576241381298 | 0.8354053281315557 | 0.2611020866795220 |
| 0.2500000000000000 | 0.1528899970000026 | 0.0795100030000029 |
| 0.2516103457985784 | 0.6538128544230489 | 0.2171082546990895 |
| 0.2507986439530767 | 0.1473231732699102 | 0.3474995643187715 |
| 0.2497689701489989 | 0.5001631872089973 | 0.0942163245230034 |
| 0.2502902387497924 | 0.9988193821765641 | 0.2239738903621779 |
| 0.2510634217082265 | 0.5035767181644080 | 0.3603423741172962 |
| 0.2500000000000000 | 0.8471000190000026 | 0.0795100030000029 |
| 0.2503135985882402 | 0.3481433232020303 | 0.2180130509519976 |
| 0.2493924971290246 | 0.8516467128055608 | 0.3475082910596010 |

|                    |                    |                    |
|--------------------|--------------------|--------------------|
| 0.0833299980000035 | 0.5137699839999996 | 0.0094599999999971 |
| 0.0841400257704102 | 0.0127700805367156 | 0.1392206922705105 |
| 0.0843341573731559 | 0.5185270445592488 | 0.2768302679914590 |
| 0.0833299980000035 | 0.8195599909999984 | 0.0094599999999971 |
| 0.0838579557374566 | 0.3209062984507636 | 0.1391870905999065 |
| 0.0821762656302928 | 0.8198695874769769 | 0.2762158805238867 |
| 0.0833299980000035 | 0.1666699949999995 | 0.0000000000000000 |
| 0.0834777126527994 | 0.6667015686822509 | 0.1311313383931647 |
| 0.0833309204326576 | 0.1668630357026933 | 0.2593588580392938 |

**8. Transition structure of methane adsorption on  $\alpha$ -Ir/Fe<sub>2</sub>O<sub>3</sub>(110)-O<sub>v</sub> surface:**

$$a = 13.66150 \text{ \AA} \quad \alpha = 90.0000^\circ$$

$$b = 8.56060 \text{ \AA} \quad \beta = 90.0000^\circ$$

$$c = 19.23870 \text{ \AA} \quad \gamma = 90.2605^\circ$$

**C Fe H Ir O**

1 35 4 1 53

|                    |                    |                    |
|--------------------|--------------------|--------------------|
| 0.4832051740250023 | 0.3766144622169989 | 0.4297131810370018 |
| 0.9879528827840005 | 0.6708328507570016 | 0.0471576645820022 |
| 0.9788276116269969 | 0.1658619843620031 | 0.1728912685819992 |
| 0.9697958637759996 | 0.6720991700070016 | 0.3103792717829990 |
| 0.6956773925030006 | 0.6616612605769987 | 0.0453522449150014 |
| 0.6873661247940035 | 0.1687285530019977 | 0.1830050563949968 |
| 0.6897675516799993 | 0.6619799914699982 | 0.3089757757449973 |
| 0.6545283940340028 | 0.0043413473379985 | 0.0473678770219976 |
| 0.6440908655849995 | 0.5000274061910019 | 0.1733789905790033 |
| 0.6390851575339980 | 0.9956824695830022 | 0.3101399674180030 |

|                    |                    |                    |
|--------------------|--------------------|--------------------|
| 0.3621910495860021 | 0.9948601625480009 | 0.0453097730620016 |
| 0.3551792712899982 | 0.5004171907759982 | 0.1816255911190012 |
| 0.3425411625700008 | 0.9920002709569999 | 0.3063784192460020 |
| 0.3211596665019982 | 0.3376005973680023 | 0.0472076275099980 |
| 0.3113885960620024 | 0.8321563817919966 | 0.1718489598739978 |
| 0.3038661728599976 | 0.3328344520789983 | 0.3112389730479990 |
| 0.0287215027509973 | 0.3282102758129994 | 0.0452997425470016 |
| 0.0219522752420005 | 0.8338070376530027 | 0.1823178301189969 |
| 0.0110788336300018 | 0.3314599051469997 | 0.3078846144410008 |
| 0.8454573653329973 | 0.9959083394640018 | 0.0471888519670003 |
| 0.8546222803289965 | 0.5023923218849973 | 0.1717500527379983 |
| 0.8664987336619987 | 0.9953007591469998 | 0.3107369530800028 |
| 0.8044725748190018 | 0.3382701221210027 | 0.0453201122230027 |
| 0.8110019669850033 | 0.8353583746130013 | 0.1829140100210012 |
| 0.8203161708349995 | 0.3344299973850013 | 0.3056575306439981 |
| 0.5119769658469977 | 0.3295500607979989 | 0.0472528449679999 |
| 0.5218580393799996 | 0.8372153627529997 | 0.1711269096959995 |
| 0.4712905733769972 | 0.6717277508859993 | 0.0453619542290014 |
| 0.4780359299990025 | 0.1694607217039987 | 0.1844639039300020 |
| 0.4940872280039983 | 0.6710719409090018 | 0.3007445479070014 |
| 0.1787111151660028 | 0.6625718241679976 | 0.0471282144609972 |
| 0.1886505160209992 | 0.1683365346680006 | 0.1720693055460032 |
| 0.1997887310010000 | 0.6591868893389972 | 0.3114899804149971 |
| 0.1379521757380004 | 0.0049926750490030 | 0.0451991862580030 |
| 0.1450835407590034 | 0.4996135921940024 | 0.1830234973599971 |



|                    |                    |                    |
|--------------------|--------------------|--------------------|
| 0.1528975206789980 | 0.0024411703439995 | 0.3063247478430000 |
| 0.4739142033790031 | 0.2856789129190034 | 0.4705310772099978 |
| 0.5321316273950032 | 0.2519222064230036 | 0.4024135282040007 |
| 0.4094755076320027 | 0.4256151318620027 | 0.4231846653310001 |
| 0.5338914601249982 | 0.4645268861919973 | 0.4508697086910018 |
| 0.5262172589870033 | 0.3442908323480012 | 0.3185164034980019 |
| 0.9166700239999983 | 0.1804399939999968 | 0.0795100030000029 |
| 0.9156548985899988 | 0.6803254629939985 | 0.2163416829870002 |
| 0.9143697435520011 | 0.1867589535079972 | 0.3489315158539981 |
| 0.9164983921509986 | 0.8329117245779969 | 0.0935110368779988 |
| 0.9164177716169988 | 0.3314533854630000 | 0.2239754560630018 |
| 0.9192328745499978 | 0.8343483165090007 | 0.3587508227840033 |
| 0.9166700239999983 | 0.4862299859999979 | 0.0795100030000029 |
| 0.9174059533510004 | 0.9866820781650034 | 0.2159060509209993 |
| 0.9181160388359970 | 0.4844434663390018 | 0.3459980245890009 |
| 0.7500000000000000 | 0.1528899970000026 | 0.0094599999999971 |
| 0.7501052078440011 | 0.6546100629349993 | 0.1396294381500027 |
| 0.7484084172929997 | 0.1538742372069990 | 0.2741967918889969 |
| 0.7500000000000000 | 0.8471099730000020 | 0.0094599999999971 |
| 0.7495329929690016 | 0.3469613422560016 | 0.1392353821480015 |
| 0.7528073336760031 | 0.8606365840079988 | 0.2761459683219982 |
| 0.7500000000000000 | 0.5000000000000000 | 0.0000000000000000 |
| 0.7490074689039972 | 0.0007375385640032 | 0.1308991353419984 |
| 0.7480488159100034 | 0.4943241751529968 | 0.2603484383350008 |
| 0.5837998191019977 | 0.5139018858349971 | 0.0790589590280035 |

|                    |                    |                    |
|--------------------|--------------------|--------------------|
| 0.5819202767239986 | 0.0139796769810019 | 0.2186679798009976 |
| 0.5833077958239983 | 0.1678081312290018 | 0.0950189673090023 |
| 0.5829873480039964 | 0.6679783469350014 | 0.2214526474559975 |
| 0.5987446968799972 | 0.1674221535820024 | 0.3647703453479991 |
| 0.5833299760000017 | 0.8195599909999984 | 0.0795100030000029 |
| 0.5790023645749969 | 0.3229638219609967 | 0.2166765610540011 |
| 0.5881049793569986 | 0.7961430545789980 | 0.3497759528260005 |
| 0.4166699949999995 | 0.1804399939999968 | 0.0094599999999971 |
| 0.4159667946100001 | 0.6807225230310010 | 0.1386539373269997 |
| 0.4127530056900000 | 0.1768542469949992 | 0.2757316761650017 |
| 0.4166699949999995 | 0.4862299859999979 | 0.0094599999999971 |
| 0.4165873919439989 | 0.9884184796249968 | 0.1395443414539983 |
| 0.4201532798560024 | 0.4899720623850001 | 0.2743092104879992 |
| 0.4166699949999995 | 0.8333299760000017 | 0.0000000000000000 |
| 0.4158133476909995 | 0.3330555864380003 | 0.1305651340390028 |
| 0.4171082447060002 | 0.8340913152440024 | 0.2606674804929980 |
| 0.2500000000000000 | 0.1528899970000026 | 0.0795100030000029 |
| 0.2513968437759999 | 0.6528611893640033 | 0.2167245434919991 |
| 0.2477432780460020 | 0.1469063557949966 | 0.3473606943240028 |
| 0.2496796483849977 | 0.4998791832390026 | 0.0940518276419979 |
| 0.2487475459469977 | 0.9984489267850023 | 0.2236724085109998 |
| 0.2558955961290010 | 0.4989913343479984 | 0.3584811016350002 |
| 0.2500000000000000 | 0.8471000190000026 | 0.0795100030000029 |
| 0.2503490902809986 | 0.3464956811950017 | 0.2167474642909966 |
| 0.2473771305210022 | 0.8502187810150020 | 0.3469947348775216 |

|                    |                    |                     |
|--------------------|--------------------|---------------------|
| 0.0833299980000035 | 0.5137699839999996 | 0.0094599999999971  |
| 0.0836293620480006 | 0.0130695183519975 | 0.1387828754929998  |
| 0.0854922778040006 | 0.5176963614609988 | 0.27744444650380019 |
| 0.0833299980000035 | 0.8195599909999984 | 0.0094599999999971  |
| 0.0834351206990007 | 0.3212954885430008 | 0.1392030944129985  |
| 0.0823455113339975 | 0.8184945449430003 | 0.2747417216160031  |
| 0.0833299980000035 | 0.1666699949999995 | 0.0000000000000000  |
| 0.0834975646500027 | 0.6662626738890012 | 0.1308766248009974  |
| 0.0816527305720030 | 0.1664124384830004 | 0.2592730129739991  |

**9. Intermediate structure of methane adsorption on  $\alpha$ -Ir/Fe<sub>2</sub>O<sub>3</sub>(110)-O<sub>v</sub> surface:**

$$a = 13.66150 \text{ \AA} \quad \alpha = 90.0000^\circ$$

$$b = 8.56060 \text{ \AA} \quad \beta = 90.0000^\circ$$

$$c = 19.23870 \text{ \AA} \quad \gamma = 90.2605$$

**C Fe H Ir O**

1 35 4 1 53

|                    |                    |                    |
|--------------------|--------------------|--------------------|
| 0.4737308030396034 | 0.4092186287273420 | 0.4223475271145464 |
| 0.9879500269999966 | 0.6708300109999996 | 0.0471599999999981 |
| 0.9790318911922303 | 0.1657687471136021 | 0.1728681089241524 |
| 0.9691352181703494 | 0.6716281156690872 | 0.3103582727089355 |
| 0.6956800219999977 | 0.6616600159999990 | 0.0453499999999991 |
| 0.6867957408147664 | 0.1704041546739502 | 0.1825374027535192 |
| 0.6889048781936545 | 0.6603952691546484 | 0.3090710747771734 |
| 0.6545299889999967 | 0.0043399999999991 | 0.0473700020000010 |
| 0.6429345790726867 | 0.4987471758226115 | 0.1738846878993770 |
| 0.6416378081512408 | 0.9912105071619709 | 0.3068792905958650 |

|                    |                    |                    |
|--------------------|--------------------|--------------------|
| 0.3621900079999989 | 0.9948599929999986 | 0.0453100020000008 |
| 0.3530593001955762 | 0.5003749286440805 | 0.1810494693549120 |
| 0.3430443725006688 | 0.9939863388889859 | 0.3059362737213654 |
| 0.3211599890000016 | 0.3375999929999978 | 0.0472099999999998 |
| 0.3113114300533429 | 0.8328586729007035 | 0.1719396923208108 |
| 0.3050348773815197 | 0.3366123372541880 | 0.3136890366148712 |
| 0.0287200010000035 | 0.3282099959999982 | 0.0452999990000009 |
| 0.0225060536377336 | 0.8340218515872850 | 0.1826636743091397 |
| 0.0109645300827913 | 0.3313492900143154 | 0.3079872798379044 |
| 0.8454599980000026 | 0.9959099889999976 | 0.0471899989999969 |
| 0.8543965448446245 | 0.5023305426322487 | 0.1717514650186672 |
| 0.8669460053693746 | 0.9947567282409375 | 0.3106436500542935 |
| 0.8044700029999987 | 0.3382700089999986 | 0.0453199999999967 |
| 0.8116528729240253 | 0.8348101286107685 | 0.1818108853151103 |
| 0.8201638983517315 | 0.3343895953967781 | 0.3056894786132939 |
| 0.5119799969999974 | 0.3295499979999974 | 0.0472499990000017 |
| 0.5208167712074548 | 0.8360631840293521 | 0.1710216955527700 |
| 0.4712899920000027 | 0.6717299820000022 | 0.0453599989999987 |
| 0.4790907654834394 | 0.1712856894879995 | 0.1842727797943235 |
| 0.4937170555243178 | 0.6710975847325269 | 0.3016607222049557 |
| 0.1787099989999987 | 0.6625700000000023 | 0.0471300000000028 |
| 0.1891728138867000 | 0.1695983012468405 | 0.1722156051103365 |
| 0.1984482952181814 | 0.6617207239646616 | 0.3112442051107981 |
| 0.1379500030000003 | 0.0049899999999994 | 0.0452000009999978 |
| 0.1443976366633153 | 0.4996851883711355 | 0.1834672737732802 |

|                    |                    |                    |
|--------------------|--------------------|--------------------|
| 0.1537041991704261 | 0.0040066374682764 | 0.3066272324519522 |
| 0.4528278040557366 | 0.3055223298700773 | 0.4535574048949079 |
| 0.5676791262675092 | 0.1495548673437597 | 0.4121150433101242 |
| 0.4128188418943949 | 0.4931104554998724 | 0.4261927287193880 |
| 0.5391354133780593 | 0.4622498592965280 | 0.4473038166457601 |
| 0.5150270451895640 | 0.3526997610445019 | 0.3222885230638893 |
| 0.9166700239999983 | 0.1804399939999968 | 0.0795100030000029 |
| 0.9155441170096995 | 0.6803125619792508 | 0.2162408668784825 |
| 0.9138258348342649 | 0.1863219290531570 | 0.3490484725903455 |
| 0.9164999719999969 | 0.8329100010000019 | 0.0935100020000021 |
| 0.9155305781396716 | 0.3303701680990880 | 0.2241429714729460 |
| 0.9179426989391168 | 0.8332721212260042 | 0.3589851509911363 |
| 0.9166700239999983 | 0.4862299859999979 | 0.0795100030000029 |
| 0.9172229979148131 | 0.9868428293855176 | 0.2159059158132998 |
| 0.9173615076132831 | 0.4839135703140924 | 0.3461718823724759 |
| 0.7500000000000000 | 0.1528899970000026 | 0.0094599999999971 |
| 0.7497576264968507 | 0.6540771790987979 | 0.1396847796636369 |
| 0.7454316334244597 | 0.1531434044696732 | 0.2765116169450462 |
| 0.7500000000000000 | 0.8471099730000020 | 0.0094599999999971 |
| 0.7498231190000442 | 0.3470593552213251 | 0.1392460857566040 |
| 0.7531373231709587 | 0.8589587885459692 | 0.2753398574062426 |
| 0.7500000000000000 | 0.5000000000000000 | 0.0000000000000000 |
| 0.7490756599306637 | 0.0013783686737236 | 0.1310319352367447 |
| 0.7478166634110575 | 0.4937528469631156 | 0.2604622909902483 |
| 0.5838000179999980 | 0.5138999819999981 | 0.0790600030000022 |

|                    |                    |                    |
|--------------------|--------------------|--------------------|
| 0.5822905328803452 | 0.0123569201430464 | 0.2180968362947123 |
| 0.5833100079999980 | 0.1678099929999988 | 0.0950200039999984 |
| 0.5824158161071510 | 0.6675068656230148 | 0.2219931021086135 |
| 0.5925675919608668 | 0.1713183059614834 | 0.3653987965279377 |
| 0.5833299760000017 | 0.8195599909999984 | 0.0795100030000029 |
| 0.5802954501386479 | 0.3201939526003033 | 0.2168107248640372 |
| 0.5890109470607978 | 0.8012332581450636 | 0.3495911802802815 |
| 0.4166699949999995 | 0.1804399939999968 | 0.0094599999999971 |
| 0.4154576116294045 | 0.6810591263662853 | 0.1385864219132928 |
| 0.4143647222588076 | 0.1779516687084045 | 0.2753277873303227 |
| 0.4166699949999995 | 0.4862299859999979 | 0.0094599999999971 |
| 0.4168046079648525 | 0.9891119199054343 | 0.1395239616817444 |
| 0.4166890904239089 | 0.4943623155225077 | 0.2733274912254061 |
| 0.4166699949999995 | 0.8333299760000017 | 0.0000000000000000 |
| 0.4157754023687584 | 0.3336001253904580 | 0.1305458400828823 |
| 0.4170289346266667 | 0.8348125326340426 | 0.2606456801904435 |
| 0.2500000000000000 | 0.1528899970000026 | 0.0795100030000029 |
| 0.2500139605761846 | 0.6544024010412832 | 0.2164692693823984 |
| 0.2487469765258700 | 0.1479471923905177 | 0.3473782392526353 |
| 0.2496799979999977 | 0.4998799860000034 | 0.0940499980000027 |
| 0.2489106271364817 | 0.9997623835822635 | 0.2236104071311592 |
| 0.2511048962477079 | 0.5004377804302078 | 0.3588841826348019 |
| 0.2500000000000000 | 0.8471000190000026 | 0.0795100030000029 |
| 0.2498800207831502 | 0.3472431869495434 | 0.2176601853923449 |
| 0.2478917050076814 | 0.8516270449353003 | 0.3475776382731736 |

|                    |                    |                    |
|--------------------|--------------------|--------------------|
| 0.0833299980000035 | 0.5137699839999996 | 0.0094599999999971 |
| 0.0837259120858494 | 0.0132445273863971 | 0.1389169579589745 |
| 0.0836164868173799 | 0.5184242151579764 | 0.2769809659515942 |
| 0.0833299980000035 | 0.8195599909999984 | 0.0094599999999971 |
| 0.0831976526019880 | 0.3213325475973840 | 0.1393057936335717 |
| 0.0820350576205342 | 0.8195149777854654 | 0.2753921579686345 |
| 0.0833299980000035 | 0.1666699949999995 | 0.0000000000000000 |
| 0.0832165328482760 | 0.6663585693301785 | 0.1308848681773886 |
| 0.0811781409240654 | 0.1666754926721827 | 0.2595993647839441 |

**Optimized methane structure coordinates:**

$$a = 15.00000 \text{ \AA} \quad \alpha = 90.0000^\circ$$

$$b = 15.00000 \text{ \AA} \quad \beta = 90.0000^\circ$$

$$c = 15.00000 \text{ \AA} \quad \gamma = 90.0000^\circ$$

C H

1 4

|                    |                    |                    |
|--------------------|--------------------|--------------------|
| 0.4080378110853579 | 0.4384116974283478 | 0.4343628899354117 |
| 0.4079485071343817 | 0.5115675472593658 | 0.4343592430508548 |
| 0.4746173315228771 | 0.4140481742531243 | 0.4522205375445904 |
| 0.3592043137003089 | 0.4140659828804318 | 0.4831127688077719 |
| 0.3901120387570731 | 0.4140666085120550 | 0.3677545618613718 |

**References**

- [1] Haas, P.; Tran, F.; Blaha, P., Calculation of the Lattice Constant of Solids with Semilocal Functionals. *Physical Review B* 2009, *79*, 085104.
- [2] Bredow, T.; Gerson, A. R., Effect of Exchange and Correlation on Bulk Properties of MgO, NiO, and CoO. *Physical Review B* 2000, *61*, 5194.
